# Supplementary material for: Trends analysis of PM source contributions and chemical tracers in NE Spain during 2004–2014: A multi-exponential approach
Source: Copernicus journal article supplement (doi:10.5194/acp-2016-33), 2016-03-29
Supplement: Supplementary file [file acp-2016-33-AC1-supplement.pdf]

## **Answer to the comments from Referee#1**

We thank the Reviewer#1. With his/her comments the quality and readability of the manuscript have been strongly improved.

The **GREEN colour** was used to highlight changes in the revised manuscript rose from the comments from Referee#1.

### **General Comments.**

*In this paper a trend analysis of PM<sub>x</sub> concentrations recorded at two different sites in NE Spain during the period 2004-2014 has been performed. PM<sub>10</sub> and PM<sub>2.5</sub> chemical composition and PM<sub>10</sub> source contributions have also been evaluated with the aim to obtain more accurately interpretations of the trends as well as of the effectiveness of the pollution control measures implemented in this period by the administrations. Two different methodologies have been used. Namely, the Mann-Kendall test (MK) and the Multi-Exponential fit (ME). In brief, I think that the present work shows some significant and novel contributions to the global scientific community in relation with trend analysis of atmospheric pollutants issues. I think that the availability of time series of PM chemical composition and of estimations of PM source contributions from receptor models, such as PMF, is nowadays a key factor for establishing reliable source-receptor relationships and obtaining robust results from trend analysis and even epidemiological analysis. However, some significant changes must be performed to clarify the usefulness of the different methodologies employed, to reduce the excess of information provided in the manuscript that makes the reading very hard, and to justify the behaviour observed of the trends of some of the time series analyzed.*

### **Specific Comments.**

*1) In spite of the fact that the main results of the work (the pollution control measures effectively produced a reduction of the contributions from some anthropogenic sources in such a way that the PM<sub>x</sub> levels decreased at the urban-background and the regional background sites) are rather consistent and well justified, it is not clear the advantage of using simultaneously both trend analysis approaches, MK and ME. In general when the ME showed a linear fit, the MK also showed a statistically significant linear trend, but sometimes it is not statistically significant, as in the case of Zn and Na in PM<sub>10</sub> for the Montseny site. How should we interpret these different behaviours?. In the case that the MK showed a highly significant linear reduction trend and the ME showed a double exponential fit, Cd in PM<sub>10</sub> for the Barcelona site, what result must prevail, the MK or the ME one?. Please, try to clarify the best way to take advantage of using both methodologies.*

In order to take into account the Referee's comment and to reduce the excess of information provided in the manuscript the following changes were performed:

- a) In the revised version of the manuscript ME and MK tests are not presented together and or MK results or ME results are presented. Thus, when the trend is exponential (linear) the results from Mann-Kendall test (Multi-exponential test) are not presented. In this way, we highlight in the manuscript the fact that the two fits are different and that the MK test does not properly fit the data when these have actually an exponential trend. Similarly, there is no need to use the ME test when the trend is linear. This will avoid creating confusion for the readers. In fact, when the trend is exponential (single or double) the results from the MK test are always statistically significant; however data are not well fitted using MK in this case. On the other side, when the trend is linear (not exponential) we do not need the ME test and the trend can be or not statistically significant. Moreover, with this change we also highlight in the manuscript the main difference between the MK and ME fits: when a trend is exponential it means that the observed decreasing trend was not constant and gradual over time (as indicated by the MK fit).
- b) We also removed from the manuscript (Figures and Tables) those species or source contributions showing no statistically significant trends. In this way we further reduce excess information presented in the manuscript. Species or sources showing no trend are now commented in the manuscript but are removed from Tables and Figures.

2) *Why did you decide to work with annual mean values instead of monthly mean values?. It strongly reduced the number of data for the trend analysis.*

We show in the manuscript that despite the rather low annual data coverage of filter data, the trends of the annual means can be reasonably studied. However, the use of monthly means could introduce undesired noise given that filter collection is not always evenly distributed along the year (i.e. because of intensive campaigns, technical problems,.....). Given that the basic information (trend magnitude and statistical significance) provided using annual or monthly means is similar we would like to use the annual means in our manuscript.

3) *In my opinion, the MK results can be easily interpreted by the potential readers. I mean, the test provides a statistically significant downward or upward trends for a given confidence level and the value of an estimator of the trend (%variation/year). If the test provides a non-statistically significant trend, then it must be interpreted as the absence of trend. In the case of the ME results it is not clear the meaning of linear, single exponential and double-exponential fit in relation with the trends of the pollutants. For the double-exponential fit cases, the values of T1 and T2 are sometimes quite different, even positive and negative. Despite some explanations of these values are included in the text, the interpretation remains somewhat obscure. Some more information should be included in the 2.5 section about the interpretation of the equations and coefficients representing linear, single-exponential and double-exponential fit. Is the multi-exponential fit statistically significant in all the cases?. I suppose that the fit parameters  $a$  and  $T_n$  are estimated by the program with statistical significance for a given confidence level. As in the case of the coefficients of a multilinear regression analysis. Is not it?. Please, try to clarify all these questions in the revised version of the manuscript.*

We agree with the reviewer that the statistical significance of the exponential fits is missing in the manuscript. In the revised version of the manuscript p-values are provided for both linear (Mann-Kendall) and exponential fits. Tables 2,3 and 5 and text were opportunely modified. Moreover, the following text was added to Paragraph 2.5 in order to help the reader to interpret the results from the exponential fit.

“The main difference between linear and exponential fit is that in the latter case the trend is not gradual and constant over time. For an exponential trend the absolute [ $\mu\text{g}/\text{m}^3$ ] reduction per year decreases with time being the highest at the beginning of the period. Conversely, for a linear fit the absolute reduction is constant over time. For an exponential fit, the lower the characteristic time  $\tau$  the more rapidly the considered quantity vanishes. Deviations from single exponential fit can be taken into account introducing more exponential terms. In this work for example two exponential terms were sometimes used. In this case, two characteristic times are calculated by the software. If the decrease of the considered quantity is very sharp at the beginning of the period (more than exponential) than both  $\tau_1$  and  $\tau_2$  are positive. Conversely, an exponential term with negative  $\tau$  takes into account

for possible increases of the quantity at the end of the period. Both  $\tau_n$  and  $a_n$  are calculated by the program by means of the least square method minimizing the residue  $\omega$  and the statistically significance of the exponential fit is provided by means of the p-value.”

4) *Otherwise, the ME and MK methodologies provides for any case a lot of information. I mean, the trend estimation, p-value, type of fit... These results are summarized in tables 1-5. However, the authors decided to include most of this information again in the text. As a consequence the reading is very hard and confusing. For the MK results it is not necessary to include the magnitude of the trend and the degree of statistical significance in all the cases. Please, try to highlight in the manuscript only the most important information and refer to the tables for details.*

Following the reviewer comment, in the revised manuscript the text was shortened as much as possible in order to avoid repeated information. Moreover, as already stated in the answer to the *specific comment #1*, or MK or ME results (not both) are presented in the revised manuscript, thus further helping in making the text more readable.

5) *I would like to underline one important fact. Sometimes it can be read in the text statements as “non-statistically significant decreasing trend (-1.25 %/year” (page 10, lines 297-298). I completely disagree with this. If the test provides a non-statistically significant trend result, you cannot assure the existence of a trend, neither downward nor upward. That is the aim of performing statistical tests. Accepting or rejecting null hypothesis with statistical significance. Hence, you can neither talk about increasing or decreasing trend nor show the value of the estimator of the trend in the non-statistically significant trend cases. I believe that you must rewrite the manuscript and the tables, excluding the values of the estimator of the trends for non-statistically significant cases.*

We agree with the reviewer. Consequently, we removed from the manuscript (Figures and Tables) those species or source contributions showing no statistically significant trends. In this way we further reduce excess information presented in the manuscript. Species or sources showing no trend are now commented briefly in the manuscript but are removed from Tables and Figures.

6) *The reason why you decide not to use the data of mineral matter and road traffic emissions from the Barcelona site before 2009, has been repeatedly mentioned across the manuscript.*

*And*

7) *The statement that “2002-2014 represented the largest period of gravimetric PM2.5 measurements available at MSY station” has been also repeated unnecessarily.*

Repetitions are avoided as much as possible in the revised manuscript.

8) *In page 10 (lines 304-310) and page 13 (lines 402-403) you mentioned results from subsequent sections. I think it should be avoided for clarity.*

The sentence at page 10, lines 304-310: “We will show later (*Paragraph 4.1*) that despite the fact that the gravimetric concentrations of PM<sub>10</sub> at MSY only slightly decreased monotonically with time (-0.47 %/yr with  $p>0.1$ ; cf. Table 1), the contributions from specific PM<sub>10</sub> pollutant sources from PMF model related with anthropogenic activities showed non linear (i.e. exponential) statistically significant decreasing trends. For example the *Ammonium sulfate* source contribution to PM<sub>10</sub> at MSY decreased at the rate of -2.02 %/yr with  $p<0.05$  310 from MK test and double exponential fit of the data was needed; cf. Table 5).”

Was replaced with:

“Given that the trends of the considered PM<sub>x</sub> fractions were linear at both sites (NL<10%), only results from MK test were reported in Table 1. However, we will show later (*Paragraph 4.1*) that the contributions from specific PM<sub>10</sub> pollutant sources from PMF model, mainly those related with anthropogenic activities, showed non-linear (i.e. exponential) decreasing trends, thus mirroring the different effectiveness of the mitigation strategies depending on the source of pollutants considered.”

Moreover, the sentence at page 13, lines 402-403: “Interestingly, as shown later, the PM<sub>10</sub> Industrial/metallurgy source contribution at BCN also showed a DE decreasing trend”, was removed from the text.

9) *In section 3.2 you attributed the differences observed in the magnitude of the trends for different time periods to meteorology variability. In section 3.3 (lines 509-511) you stated that “It is probable that variations in meteorological conditions from one year to another (i.e. intensity and frequency of Saharan dust outbreaks) might also explain the observed trend of mineral tracers at regional level”. In section 4.1 (lines 656-658) you also declared that “This decreasing trend could be due to a possible decrease of the emissions of anthropogenic mineral species from specific sources such as cement and concrete production and construction works”. These comments are highly speculative due to the fact that neither meteorological variables, nor information on “intensity and frequency of Saharan dust outbreaks”, nor information on “cement and concrete production and construction works” have been analyzed to support them. In my opinion it should be mandatory to carry out an analysis of this kind of data to confirm these hypotheses.*

In section 3.2 we compared the trends of PM<sub>2.5</sub> mass concentrations over different periods with the main aim of: a) being consistent with what already published at MSY station by Cusack et al. (2011) where 9 yr of data (2002-2010) were used, and b) to study the differences in the trends over short periods (9 yr to 13 yr). The fact that the trends were statistically significant over different periods confirms the effectiveness of the measures taken to improve air quality.

To take into account the reviewer comment, the following sentences were removed from *Pragraph 3.2*:

“However, the difference observed in the magnitude of the trends during 2004-2014 compared to the results provided by Cusack et al. (2012) suggested that meteorology (in this case a large increase in 2012; cf. Figure 2), changing from year to year, also determined the degree of comparability of trends observed over different periods.”

and

“Thus, over relatively short periods (9 -11 yr), the effects of just one meteorologically different year were clearly visible.”.

And the following sentence was added at the end of Paragraph 3.2:

“However, it should be noted that the statistical significance of the trends observed for the larger periods was lower compared to Cusack et al. (2012). The difference observed in the magnitude of the trends during 2004-2014 compared to the results provided by Cusack et al. (2012) was mainly due to the increase of PM<sub>2.5</sub> mass concentration in 2012 (cf. Figure 2). Chemical PM<sub>2.5</sub> speciated data revealed that this increase was partly driven by organic matter showing a mean annual concentration in 2012 higher by around 20% compared to the 2004-2014 average.”

Moreover, in Paragraph 3.3 we reported that the total reduction observed for the concentrations of mineral species was higher in PM<sub>2.5</sub> mass fraction compared to PM<sub>10</sub>, thus suggesting an anthropogenic contribution to the mass of mineral matter in PM<sub>2.5</sub> and that this anthropogenic contribution likely decreased with time as already observed by Cusack et al. (2012).

In order to better explain possible reasons for the trends observed for mineral matter the following sentence:

“As for Cr, Sn, Sb and Cu, the trends of mineral species (Al<sub>2</sub>O<sub>3</sub>, Ca, Fe) were studied only at MSY station. For these elements, linear (with the exception of Al<sub>2</sub>O<sub>3</sub> in PM<sub>2.5</sub> which was SE) and statistically significant decreasing trends (with the exception of Ca in PM<sub>2.5</sub> with  $p > 0.1$ ) were detected. On average the TR were higher in the fine fraction, ranging from 50% for Ca to 66% for Al<sub>2</sub>O<sub>3</sub>, compared to PM<sub>10</sub> (16-38% cf. Table 2) thus likely suggesting a decrease with time of the concentrations of anthropogenic mineral species from specific sources such as cement and concrete production and production works. In fact, coarse mineral matter at regional background sites is mainly of natural origin. Downward decreasing trend for mineral matter contribution in PM<sub>2.5</sub> at MSY was also reported by Cusack et al. (2012) for the period 2002 – 2010 at the same station. It is probable that variations in meteorological conditions from one year to another (i.e. intensity and frequency of Saharan dust outbreaks) might also explain the observed trend of mineral tracers at regional level.”

Was replaced with the following sentence:

“For the mineral species (Al<sub>2</sub>O<sub>3</sub>, Ca, Fe) linear (with the exception of Al<sub>2</sub>O<sub>3</sub> in PM<sub>2.5</sub> which was SE) and statistically significant decreasing trends were detected at MSY. On average the TR was higher in the fine fraction, ranging from 50% for Ca to 66% for Al<sub>2</sub>O<sub>3</sub>, compared to PM<sub>10</sub> (6-38% cf. Table 2). Downward

decreasing trend for crustal material in PM<sub>2.5</sub> at MSY was also reported by Cusack et al. (2012) for the period 2002 – 2010 and by Querol et al. (2014) for the period 2001 – 2012. These trends were probably driven by weather conditions associated with negative NAO index (iNAO) that could be the cause for this slight reduction observed in crustal material. Pey et al. (2013) found a correlation between iNAO (calculated between June and September) and the contribution of Saharan dust to PM<sub>10</sub> mass in NE of Spain showing that the more negative is the iNAO the lower is the dust contribution to PM. The iNAO was unusually negative during the period 2008 – 2012 (<http://www.cpc.ncep.noaa.gov/products/precip/CWlink/pna/norm.nao.monthly.b5001.current.ascii>) thus likely contributing to explain the observed trends of crustal elements. Moreover, negative NAO can favour the presence of fronts that can sweep the Iberian Peninsula from West to East causing higher wind and less stagnant conditions thus favouring the dispersion of pollutants. In addition, as suggested by Cusack et al (2012), it could also be hypothesised that some part of the crustal material measured at MSY is a product of the construction industry. The construction industry in Spain has been especially affected by the current economic recession, and crustal material produced by this industry may have contributed to the crustal load in PM<sub>2.5</sub>. For example, the number of home construction works in Barcelona during 2008 – 2014 (from the beginning of the economic crisis; mean number of works = 1281) reduced by around 75% compared to the period 2000 – 2007; mean number of works = 5187) (<http://www.bcn.cat/estadistica/castella/dades/timm/construccio/index.htm>). The fact that the total reduction calculated for mineral elements reported in Tables 2 and 3 was higher in PM<sub>2.5</sub> compared to PM<sub>10</sub> could corroborate this latter hypothesis.”

Moreover, the following sentence in Paragraph 4.1:

“The statistically significant decreasing trend observed at MSY for the Mineral source was in agreement with what observed at the same station by Cusack et al. (2012). This decreasing trend could be due to a possible decrease of the emissions of anthropogenic mineral species from specific sources such as cement and concrete production and construction works.”

Was replaced with the following sentence:

“Finally, the Mineral source contribution at MSY showed linear little significant decreasing trend ( $p < 0.1$ ) in agreement with what observed at the same station by Cusack et al. (2012). As already noted in Paragraph 3.3, this negative trend could be due to both a possible decrease of the emissions of finer anthropogenic mineral species from specific sources such as cement and concrete production and construction works and unusual weather conditions reducing Saharan dust contribution to PM and resuspension of dust.”

## **Minor Comments.**

*10) Did you achieve a PMF source contribution study with the PM<sub>2.5</sub> data base?. It should be interesting to compare the results of the trend analysis for PM<sub>10</sub> and PM<sub>2.5</sub> source contributions.*

Before starting with PMF analysis on PM<sub>10</sub> chemical speciated data, the PM<sub>10</sub> database for Montseny station was opportunely revised. Thus, before this work, only total carbon concentration was available for the period 2004 – 2007. In order to properly apply the PMF model, the concentrations of elemental (EC) and organic (OC) carbon in PM<sub>10</sub> were recovered from filters sampled during the period 2004 – 2007. This was not done in PM<sub>2.5</sub>. Given that the data recover implies laboratory analysis which takes rather long time we decided to apply the PMF model to the PM<sub>10</sub> mass fraction and to present trends of chemical species for both PM mass fractions.

In order to not delay the publication of this work and with the permission of the Reviewer, we would like to present PM10 source apportionment results only.

11) Page 6, lines 188-189. *“(End user’s guide to multilinear engine applications from Pentti Paatero)”*. *What do you mean?. Is that a reference?.*

The correct reference is (Paatero, 2004). We added the following reference to the bibliography:

“Paatero P.: User’s guide for positive matrix factorization programs PMF2 and PMF3, Part1: tutorial. University of Helsinki, Helsinki, Finland, 2004”

12) Page 6, line 190. *You declared that rotational ambiguity of the PMF solution was handled by means of the Fpeak parameter. However, some better tests to estimate rotational uncertainty than Fpeak are now available in the latest version of EPA PMF (V.5.0) such as the base model displacement error estimation and other rotational tools. Have you checked these new options?.*

The aim of this work was to study trends of source contributions. To do this we applied the PMF model to 11 yr of chemical speciated data. Thus, we supposed that the chemical profiles of the detected sources did not change with time. To test this hypothesis we performed a “sliding PMF” (using groups of 3 years of data: i.e. 2004-2006; 2005-2007; 2006-2008 and so on) comparing the retrieved source profiles. The results suggested that the error in detecting source profiles and contributions was lower using the whole (11 years) database. For example, the PMF was not able to clearly detect the *Industrial/Traffic* and *V-Ni bearing* sources at MSY at the end of the considered period by means of the sliding PMF. Thus, we concluded that the best option was to use the whole database as input in the PMF model even if changes in the chemical profiles cannot be excluded. However, only in this way, the trends of the contributions of some sources such as *Industrial/Traffic* and *V-Ni* agreed well with the trends of the main tracers of these sources. Thus, given the large period used for PMF analysis, the deviation from constant profiles could largely affect the displacement results and errors.

13) Page 7. Section 2.4. *The description of the Mann-Kendall test is very short. Some more information should be included.*

Paragraph 2.4 was modified as it follows:

“The purpose of the Mann-Kendall (MK) test (Mann 1945, Kendall 1975, Gilbert 1987) is to statistically assess if there is a monotonic upward or downward trend of the variable of interest over time. A monotonic upward (downward) trend means that the variable consistently increases (decreases) through time. The Mann-Kendall test tests the null hypothesis H0 of no trend, i.e. the observations are randomly ordered in time, against the alternative hypothesis, H1, where there is an increasing or decreasing monotonic trend. The main advantage of the Mann-Kendall test is that data need not conform to any particular distribution and missing data are allowed. To estimate the slope of the trend the Sen’s method was used (Salmi et al. 2002).”

14) Page 8. Lines 230-232. What does  $C_{beg}$  and  $C_{end}$  mean?.

The following sentence was added after Equation 5:

“Where  $C_{beg}$  and  $C_{end}$  are respectively the first and the last points of the exponential fit.”

15) Page 9. Lines 259-261. The description of the section was made before in the previous section. This paragraph can be omitted.

The paragraph was removed from the text

16) Page 9. Lines 263-264. “Note that the recommended annual data coverage for trend studies is typically 75%”. Where does it come from?. Can you include the source in the Reference section?.

Recommended annual data coverage of 75% was recently set by the Task Force on Measurements and Modeling (TFMM-CLRTAP) in order to study trends of different pollutants in EU. However, given that this limit can be considered as quite arbitrary, the sentence was removed from the manuscript. Consequently, the paragraph was modified as follow:

“Annual data coverage is an important factor to take into account in order to study trends of a given parameter. The gravimetric PM measurements, from which chemical speciated data are obtained, are typically performed with rather low frequency over one year. In our case the annual data coverage of gravimetric measurements was around 20-30% at both Barcelona and Montseny. In this section we compare the trends of PM concentrations from gravimetric and real-time optical measurements (Table 1).”

17) Page 9. Lines 276-277. The results of the comparison between simultaneous PM<sub>x</sub> chemical speciated data collected at both BCN measurement sites can be showed as Supplementary Information.

The current location of the BCN measurement station is called *Palau Reial (PR)*. The location before 2009 was called *IJA*. The 1-month simultaneous filter measurements were performed at *IJA* and at a location (called *Torre Girona; TG*) which was very close to *PR* but likely more affected by the presence of trees and some



small buildings compared to *PR*. This is why we moved again from *TG* to *PR*. The ratios between the concentrations of chemical species simultaneously measured at *IJA* and *TG* were around  $0.20 \div 0.60$  (with  $R^2 < 0.60$  and with *TG* strongly underestimating *IJA*) for mineral and traffic tracers (bad correlation). The ratios were around  $0.70 \div 0.90$  (with  $R^2 > 0.60$  and with *TG* slightly underestimating *IJA*) for species not related with traffic and mineral sources (good correlation). Thus, we observed rather similar concentrations between *TG* and *IJA* for those species measured at BCN and included in the manuscript. Conversely, the bad correlation observed for mineral and traffic tracers confirmed that other traffic and mineral sources were affecting *IJA* but not *TG*. The lower concentration measured at *TG* compared to *IJA* for “good” species was very probably due to the presence of small buildings around *TG*. We are confident that the ratios between *PR* and *IJA* are very close to one. In conclusion, we used the measurements performed at *TG* and *IJA* in order to certainly exclude “bad” species from the analysis. For this reason and in order to avoid confusion we would like to not present this comparison in the manuscript.

18) Page 10. Line 317. *What is the definition of the Residual Component (RC)? How did you compute it? This information should be included in Section 2.*

The following sentence was added to Section 2.5

“The relative contribution of residues (Residual Component: RC) is calculated as the standard deviation of the ratios between the residue values of the fit  $\omega$  (cf. Eq. 1) and the main component of the fit.”

19) Page 20. Line 633. *Querol et al. 2007, is not included in the Reference section.*

The following reference was added:

“Querol, X., Viana, M., Alastuey, A., Amato, F., Moreno, T., Castillo, S., Pey, J., de la Rosa, J., Artíñano, B., Salvador, P., García Dos Santos, S., Fernández-Patier, R., Moreno-Grau, S., Negral, L., Minguillón, M.C., Monfort, E., Gil, J.I., Inza, A., Ortega, L.A., Santamaría, J.M., Zabalza, J.: Source origin of trace elements in PM from regional background, urban and industrial sites of Spain, *Atm. Env.*, 41, 7219-7231, 2007.”

### **Technical corrections/Typing errors.**

20) *Figure 2 has very low quality. It is very hard to distinguish among the different symbols. The grey lines and symbols are very diffuse. This is also true for figures 3, 4, 6 and 7.*

All Figures were re-edited

21) *Table 4 is unnecessary. This information is showed in Figure 5.*

Table 4 was removed.

## Trends analysis of PM source contributions and chemical tracers in NE Spain during 2004 - 2014:

### A multi-exponential approach.

Marco Pandolfi<sup>1,\*</sup>, Andrés Alastuey<sup>1</sup>, Noemi Pérez<sup>1</sup>, Cristina Reche<sup>1</sup>, Iria Castro<sup>1</sup>, Victor Shatalov<sup>2</sup> and Xavier Querol<sup>1</sup>

<sup>1</sup> Institute of Environmental Assessment and Water Research, c/ Jordi-Girona 18-26, 08034 Barcelona, Spain

<sup>2</sup> Meteorological Synthesizing Centre – East, 2nd Roshchinsky proezd, 8/5, 115419 Moscow, Russia

\*Corresponding author: marco.pandolfi@idaea.csic.es

### Abstract

In this work for the first time data from two twin stations (Barcelona, urban background, and Montseny, regional background), located in NE of Spain, were used to study the trends of the concentrations of different chemical species in PM<sub>10</sub> and PM<sub>2.5</sub> along with the trends of the PM<sub>10</sub> source contributions from Positive Matrix Factorization (PMF) model. Eleven years of chemical data (2004–2014) were used for this study. Trends of both specie concentrations and source contributions were studied using the Mann-Kendall test for linear trends and a new approach based on multi-exponential fit of the data. Despite the fact that different PM fractions (PM<sub>2.5</sub>, PM<sub>10</sub>) showed linear decreasing trends at both stations, the contributions of specific sources of pollutants and the related chemical tracers **showed exponential decreasing trends**. The different types of trends observed reflected the different effectiveness and/or time of implementation of the measures taken to reduce the concentrations of atmospheric pollutants. Moreover, the trends of the contributions from specific sources such as those related with industrial activities and with primary energy consumption mirrored the effect of the financial crisis in Spain from 2008. The sources that showed statistically significant downward trends at both Barcelona (BCN) and Montseny (MSY) during 2004-2014 were **Secondary sulfate**, **Secondary nitrate**, and *V-Ni bearing* source. The contributions from these sources decreased exponentially during the considered period indicating that the observed decrease was not gradual and consistent over time. **Conversely, the decreasing trend was less steep at the end of the period compared to the beginning thus likely indicating the attainment of a lower limit.** Moreover, statistically significant decreasing trends were observed for the contributions to PM from the *Industrial/Traffic* source at MSY (mixed metallurgy and road traffic) and from the *Industrial* (metallurgy mainly) source at BCN. These sources were clearly linked with anthropogenic activities and the observed decreasing trends confirmed the effectiveness of pollution control measures implemented at EU or regional/local levels. **Conversely, the contributions from sources mostly linked with natural processes such as Aged Marine and Aged Organics did not show statistically significant trends.** The general trends observed for the calculated PMF source contributions well reflected the trends observed for the chemical tracers of these pollutant sources.

## 1. Introduction

Meeting the air quality (AQ) standards is one of the major environmental objectives to protect people from breathing air with high levels of pollution. Many studies have been published in these last years showing clearly that the concentrations of particulate matter (PM), and other air pollutants such as sulphur dioxide (SO<sub>2</sub>) and carbon monoxide (CO), have markedly decreased during the last 15 years in many European Countries (EEA, 2013; Barmpadimos et al., 2012; Cusack et al., 2012; Querol et al., 2014; Guerreiro et al., 2014 among others). Cusack et al. (2012) reported the reduction in PM<sub>2.5</sub> concentrations observed at regional background (RB) stations in Spain and across Europe, and, in most cases, the observed reduction was gradual and consistent over time, implying the success of cleaner anthropogenic activities. Barmpadimos et al. (2012) have also shown that PM<sub>10</sub> concentrations decreased at a number of urban background (UB) and rural background stations in five European countries. Henschel et al. (2013) reported the dramatic decrease in SO<sub>2</sub> levels across six European cities, reflecting the reduction in sulphur content in fuels, as part of EU legislation, coupled with the shift towards the use of cleaner fuels. EEA (2013) also reported general decreases in NO<sub>2</sub> concentrations even if lower compared to PM. However, Henschel et al. (2015) showed that the NO<sub>x</sub> concentrations at traffic sites in many EU cities remained unchanged underlining the need of further regulative measures to meet the air quality standards for this pollutant. In fact an important proportion of the European population lives in areas exceeding the AQ standards for the annual limit value of NO<sub>2</sub>, the daily limit value of PM<sub>10</sub> and the health protection objective of O<sub>3</sub> (EEA, 2013; 2015). PM<sub>10</sub> and NO<sub>2</sub> are still exceeded mostly in urban areas, and especially at traffic sites (Harrison et al., 2008; Williams and Carslaw, 2011; EEA, 2013; among others). In Spain for example it has been reported that more than 90% of the NO<sub>2</sub> exceedances are attributed to road traffic emissions (Querol et al., 2012). Guerreiro et al. (2014) furthermore evidenced notable reduction of ambient air concentration of SO<sub>2</sub>, CO and Pb using data available in Airbase (EEA, 2013) and covering 38 European countries. Querol et al. (2014) reported trends for 73 measurement sites across Spain including RB, UB, traffic stations (TS) and Industrial sites (IND). They observed marked downward concentration trends for PM<sub>10</sub>, PM<sub>2.5</sub>, CO and SO<sub>2</sub> at most of the RB, UB, TR and IND sites considered. Similarly, Salvador et al. (2012) detected statistically significant downward trends in the concentrations of SO<sub>2</sub>, NO<sub>x</sub>, CO and PM<sub>2.5</sub> at most of the urban and urban-background monitoring sites in the Madrid metropolitan area during 1999-2008. Cusack et al. (2012) and Querol et al. (2014) have also shown the highly statistically significant decreasing trends observed at regional level in NE Spain for many trace elements since 2002 (Pb, Cu, Zn, Mn, Cd, As, Sn, V, Ni, Cr).

The observed reduction of air pollutants across Europe is the results of efficient emission abatement strategies as for example those implemented in the Industrial Emission Directives (IPPC Integrated Pollution Prevention and Control and subsequent Industrial Emission Directives 1996/61/EC and 2008/1/EC), the Large Combustion Plants Directive (LCPD; 2001/80/EC), the EURO standards on road traffic emission (1998/69/EC, 2002/80/EC, 2007/715/EC), the IMO (International Maritime Organization) directive on sulfur content in fuel and SO<sub>x</sub> and NO<sub>x</sub> emissions from ships (IMO, 2011; Directive 2005/33/EC). Additionally, the financial crisis, causing mainly a

reduction of the primary energy consumption from 2008-2009, contributed to the decrease of the ambient concentration of pollutants observed in Spain (Querol et al., 2014).

Moreover, national and regional measures for AQ have been taken in many European Countries. In Spain a national AQ plan was approved in 2011 and updated in 2013 by the Council of Ministers of the Government of Spain. Furthermore, 45 regional and 3 local (city scale) AQ plans have been implemented since 2004 in Spain. These AQ Plans mostly focused on improving AQ at major city centers or specific industrial areas.

**Thanks to the aforementioned measures, there is clear evidence that the concentrations of PM in many European countries have markedly decreased during the last decades. However, in spite of the above policy efforts, a significant proportion of the urban population in Europe lives in areas exceeding the World Health Organisation (WHO) air quality (AQ) standards i.e. for PM<sub>2.5</sub>, PM<sub>10</sub> and ozone (EEA, 2013, 2015).**

**Trend analysis of the concentration of air pollutants helps in evaluating the effectiveness of specific AQ measures depending on the pollutant considered. Examining data over time also makes it possible to predict future frequencies and/or rates of occurrence making future projections. For the abovementioned reasons, it is especially attractive the feasibility of studying the trends of the contributions to PM mass from specific pollutant sources along with the trends of the chemical tracers of these sources.**

For what we are concerned in the majority of studies dealing with trend analysis, linear fits were applied for example by using Mann-Kendall or Theil-Sen methods (Theil, 1950; Sen, 1968), the latter being available for example in the Openair software (Carslaw, 2012; Carslaw and Ropkins, 2012). However, linear fit of data does not always properly represent the observed trends. As we will show, different abatement strategies and periods of implementation may change from one pollutant to another thus leading to different trends for different pollutants, even over the same period. Thus, non-linear fit of the data may be at times strongly recommended.

**The main aim of this work was to study the trends of source contributions to PM<sub>10</sub> and specific chemical species in both PM<sub>10</sub> and PM<sub>2.5</sub> using both the consensus methodology for linear fit of the data (Mann-Kendall) and a non-linear approach. The data of Spanish national emissions and energy consumption are also evaluated to interpret the observed trends. Understanding past trends may be relevant for devising new strategies for air pollution abatement.**

PM chemical speciated data collected from 2004 to 2014 at regional (Montseny; NE Spain) and urban (Barcelona, NE Spain) sites were used with this aim. The selected period allowed for trend analysis at these twin stations over a common period. The Positive Matrix Factorization (PMF) model was used to apportion ambient PM<sub>10</sub> concentrations into pollutant sources. The PMF model, as other Receptor Models (RM), is widely used being a powerful tool to help policy makers to design more targeted approaches to protecting public health. Thus, the novelty of this study lies mainly in a) the opportunity to study the trends of **pollutant** source contributions from PMF model at two twin stations representative of the urban and regional environments in the Western Mediterranean, and, b) in the use of a novel non-linear approach for trend studies.

## 2. Measurement sites and Methodology

### 2.1 Measurement sites

The Montseny measurement station (MSY, 41°46'45.63" N, 02°21'28.92" E, 720 m a.s.l.) is a regional background site in NE of Spain (Figure 1). The MSY station is located within a regional natural park about 50 km to the NNE of the city of Barcelona (BCN) and 25 km from the Mediterranean coast. This site is representative of the typical regional background conditions of the Western Mediterranean Basin (WMB) characterized by severe pollution episodes affecting not only the coastal sites closest to the emission sources, but also the more elevated rural and remote areas land inwards due to thermally driven winds (i.e. Pérez et al., 2008; Pey et al., 2010; Pandolfi et al., 2011; 2014). This station is part of ACTRIS ([www.actris.net](http://www.actris.net)) and GAW ([www.wmo.int/gaw](http://www.wmo.int/gaw)) networks, EMEP (<http://www.emep.int/>) and the measuring network of the Government of Catalonia.

The Barcelona measurement station (BCN, 41°23'24.01" N, 02°06'58.06" E, 68 m a.s.l.) is an urban background measurement site influenced by vehicular emissions from one of the main avenues of the city (Diagonal Avenue) located at a distance of around 300 m (cf. Fig. 1). The BCN measurement site is part of the Air Quality measuring network of the Government of Catalonia. The Metropolitan Area of Barcelona (BMA), with nearly 4.5 million inhabitants, covers an 8 km wide strip between the Mediterranean Sea and the coastal mountain range. Several industrial zones, power plants, and highways are located in the area, making this region to one of the most polluted in the WMB (i.e. Querol et al., 2008; Amato et al., 2009; Pandolfi et al., 2012; 2013; 2014). At BCN the location of the measuring station changed in 2009 when it was moved by around 500 m (cf. Fig. 1). The effect of this change on PM measurements performed at BCN will discuss later.

### 2.2 Real-time and gravimetric PM measurements

Real-time PM concentrations were continuously measured at 1h resolution by optical particle counters (OPC) using GRIMM spectrometers (GRIMM 180 at MSY, and GRIMM 1107, 1129 and 180 at BCN). Hourly PM concentrations were corrected by comparison with 24h gravimetric mass measurements of PM<sub>x</sub> (Alastuey et al., 2011).

For gravimetric measurements 24h PM<sub>x</sub> samples were collected at both stations every 3-4 days on 150 mm quartz micro-fiber filters (Pallflex QAT and Whatman) with a high-volume (Hi-Vol) samplers (DIGITEL DH80 and/or MCV CAV-A/MSb at 30 m<sup>3</sup>h<sup>-1</sup>). The mass of PM<sub>10</sub> and PM<sub>2.5</sub> samples collected on filters was determined using the EN 12341 and the EN14907 gravimetric procedures, respectively.

### 2.2.1 PM chemical speciated data

Once the gravimetric mass was determined from filters, the samples were analyzed with different techniques including acidic digestion ( $\frac{1}{2}$  of each filter;  $\text{HNO}_3:\text{HF}:\text{HClO}_4$ ), water extraction of soluble anions ( $\frac{1}{4}$  of each filter), and thermal-optical analysis ( $1.5 \text{ cm}^2$  sections). Inductively Coupled Atomic Emission Spectrometry, ICP-AES, (IRIS Advantage TJA Solutions, THERMO) was used for the determination of the major elements (Al, Ca, Fe, K, Na, Mg, S, Ti, P), and Inductively Coupled Plasma Mass Spectrometry, ICP-MS, (X Series II, THERMO) for the trace elements (Li, Ti, V, Cr, Mn, Co, Ni, Cu, Zn, As, Se, Rb, Sr, Cd, Sn, Sb, Ba, rare earths, Pb, Bi, Th, U). Ionic Chromatography was used for the concentrations of  $\text{NO}_3^-$ ,  $\text{SO}_4^{2-}$  and  $\text{Cl}^-$ , whereas  $\text{NH}_4^+$  was determined using a specific electrode MODEL 710 A+, THERMO Orion. The levels of OC and EC were determined by a thermal-optical carbon analyzer (SUNSET), using protocol EUSAAR\_2 (Cavalli et al., 2010). Other analytical details may be found in Querol et al. (2008).

Following the above procedures,  $\text{PM}_{10}$  and  $\text{PM}_{2.5}$  chemical speciated data were obtained at MSY for the period 2004-2014 resulting in 1093 and 794 samples, respectively. At BCN  $\text{PM}_{10}$  and  $\text{PM}_{2.5}$  data were obtained during 2004-2014 resulting in 1037 and 1063 samples, respectively.

### 2.3 Positive Matrix Factorization (PMF) model.

The PMF model (PMFv5.0, EPA) was used on the collected daily speciated data for source identification and apportionment in  $\text{PM}_{10}$  at both sites. Detailed information about the PMF model can be found in literature (Paatero and Tapper 1994; Paatero 1997; Paatero and Hopke 2003; Paatero et al. 2005). The PMF model is a factor analytical tool reducing the dimension of the input matrix in a limited number of factors (or sources) and it is based on the weighted least-squares method. Thus, most important in PMF applications is the estimation of uncertainties of the chemical species included in the input matrix. In the present study, individual uncertainties and detection limits were calculated as in Escrig et al. (2009) and Amato et al. (2009). Thus, both the analytical uncertainties and the standard deviations of species concentrations in the blank filters were considered in the uncertainties calculations. The signal-to-noise ratio (S/N) was estimated starting from the calculated uncertainties and used as a criteria ( $S/N > 2$ ) for selecting the species used within the PMF model. In order to avoid any bias in the PMF results, the data matrix was uncensored (Paatero 2004). The PMF was run in robust mode (Paatero 1997), and rotational ambiguity was handled by means of the  $F_{\text{PEAK}}$  parameter (Paatero et al. 2005). The optimal number of sources was selected by inspecting the variation of the objective function  $Q$  (defined as the ratio between residuals and errors in each data value) with varying number of sources (i.e. Paatero et al., 2002) and by studying the physical meaningfulness of the calculated factors.

## 2.4 Mann-Kendall (MK) fit

The purpose of the Mann-Kendall (MK) test (Mann 1945, Kendall 1975, Gilbert 1987) is to statistically assess if there is a monotonic upward or downward trend of the variable of interest over time. A monotonic upward (downward) trend means that the variable consistently increases (decreases) through time. The Mann-Kendall test tests the null hypothesis  $H_0$  of no trend, i.e. the observations are randomly ordered in time, against the alternative hypothesis,  $H_1$ , where there is an increasing or decreasing monotonic trend. The main advantage of the Mann-Kendall test is that data need not conform to any particular distribution and missing data are allowed. To estimate the slope of the trend the Sen's method was used (Salmi et al. 2002).

## 2.5 Multi-exponential (ME) fit

A Program aiming at studying trends of time series of air pollution in the multi-exponential form was developed within the *The Task Force on Measurements and Modelling (TFMM)* by the *Meteorological Synthesizing Centre – East (MSC-E; <http://www.msceast.org/>)* group (Shatalov et al., 2015). The TFMM together with the *Task Force on Emission Inventories and Projections (TFEIP)*, the *Task Force on Integrated Assessment Modelling (TFIAM)*, and *Task Force on Hemispheric Transport of Air Pollution (TFHTAP)* provide a fora for discussion and scientific exchange in support of the EMEP (*European Monitoring and Evaluation Programme; <http://www.emep.int/>*) work plan which is a scientifically based and policy driven programme under the *Convention on Long-range Transboundary Air Pollution (CLRTAP; [http://www.unece.org/env/lrtap/lrtap\\_h1.html](http://www.unece.org/env/lrtap/lrtap_h1.html))* promoting the international co-operation to solve transboundary air pollution problems. The TFMM was established in 2000 to evaluate measurements and modeling and to further develop working methods and tools. In this contest, five EMEP Centers are undertaking efforts in support of the EMEP work plan, namely the *MSC-E*, the *Centre on Emission Inventories and Projections (CEIP; <http://www.ceip.at/>)*, the *Chemical Coordinating Centre (CCC; <http://www.nilu.no/projects/ccc/>)*, the *Meteorological Synthesizing Centre – West (MSC-W; [http://emep.int/mscw/index\\_mscw.html](http://emep.int/mscw/index_mscw.html))*, and the *Centre for Integrated Assessment Modelling (CIAM; <http://www.iiasa.ac.at/~rains/ciam.html>)*. In 2014, the TFMM initiated a dedicated exercise to assess the efficiency of air pollution mitigation strategies over the past 20 years to assess the benefit of the CLRTAP main policy instrument. Within this exercise a software was made available by EMEP/MSCE Center aiming at studying non-linear trends. Annual, monthly and daily resolution data can be analyzed with the help of this program. Since in this paper we will apply the program to annual averages of specie concentrations and source contributions, we restrict the description of the multi-exponential approximations for this case. In particular, seasonal variations are not included into consideration. The basic equations solved by the program for this particular case (annual averages) are reported below:



$$C_t = a_1 \cdot \exp\left(-\frac{t}{\tau_1}\right) + a_2 \cdot \exp\left(-\frac{t}{\tau_2}\right) + \dots + a_n \cdot \exp\left(-\frac{t}{\tau_n}\right) + \omega_t \quad (1)$$

Where,  $C_t$  are the values of the considered time series, with  $t = 1, \dots, N$ ,  $N$  being the length of the series (years),  $\tau_n$  are the characteristic times of the considered exponential,  $a_n$  are constants and  $\omega_t$  are the residue values. In the case of single exponential decay ( $n=1$ ) the characteristic time  $\tau$  is the time at which the pollutant concentration is reduced to  $1/e$  ( $= 0.3678$ ) times its initial value. The main difference between linear and exponential fit is that in the latter case the trend is not gradual and constant over time. For an exponential trend the absolute [ $\mu\text{g}/\text{m}^3$ ] reduction per year decreases with time being the highest at the beginning of the period. Conversely, for a linear fit the absolute reduction is constant over time. For an exponential fit, the lower the characteristic time  $\tau$  the more rapidly the considered quantity vanish. Deviations from single exponential fit can be taken into account introducing more exponential terms. In this work for example two exponential terms were sometime used. In this case, two characteristic times are calculated by the software. If the decrease of the considered quantity is very sharp at the beginning of the period (more than exponential) than both  $\tau_1$  and  $\tau_2$  are positive. Conversely, an exponential term with negative  $\tau$  takes into account for possible increases of the quantity at the end of the period. Both  $\tau_n$  and  $a_n$  are calculated by the program by means of the least square method minimizing the residue  $\omega$  and the statistical significance of the exponential fit is provided by means of the p-value. The number of exponential terms that should be included into the approximation can be evaluated using F-statistics (i.e. Smith, 2002). For example, the F-statistics for the evaluation of the statistical significance of the second term in equation (1) for  $n = 2$  can be calculated as:

$$F = \frac{(SS_1 - SS_2)}{2 \cdot s} \quad (2)$$

where  $SS_1$  and  $SS_2$  are sums of squares of residual component for approximations with one and two exponential terms, respectively, and  $s$  is the estimate of standard deviation of residual component. This statistics follows approximately the Fisher distribution with 2 and  $N - 2$  degrees of freedom. Second exponential is considered to be significant if  $F$  exceeds the corresponding threshold value at the chosen significance level.

The following parameters can be calculated from equation (1):

- Total Reduction (TR):  $TR = \frac{(C_{beg} - C_{end})}{C_{beg}} = 1 - \frac{C_{end}}{C_{beg}}$  (3)

- Annual reduction for year  $i$ :  $R_i = \frac{\Delta C_i}{C_i} = 1 - \frac{C_{i+1}}{C_i}$  (4)

- Average annual reduction:  $R_{av} = 1 - \left(\frac{C_{end}}{C_{beg}}\right)^{\frac{1}{N-1}}$  (5)

Where  $C_{beg}$  and  $C_{end}$  are respectively the first and the last points of the exponential fit. The formula for calculation of average annual reduction takes into account that the ratio  $C_{i+1} / C_i$  is a multiplicative quantity, so that geometrical mean of ratios should be used. The relative contribution of residues (Residual Component: RC) is calculated as the standard deviation of the ratios between the residue values of the fit  $\omega$  (cf. Eq. 1) and the main component of the fit.

The MSC-E also proposed a statistic which measures the deviation of the obtained trend from the linear one (Non-Linearity parameter:  $NL$ ). A trend is defined as linear if the  $NL$  parameter is lower than 10%, indicating a small difference between ME and MK fits (Shatalov et al., 2015). In the following, the reported trends were analysed using the MK test for  $NL < 10\%$  and the ME test for  $NL > 10\%$ . More detailed description of the multi-exponential approach is available in the TFMM wiki and in the MSC-E Technical report 2015 (Shatalov et al., 2015).

### 3. Results

Results are presented and discussed in the following order: In Section 3.1, we compare the trends at both stations of  $PM_x$  concentrations from optical counters (OPC; annual data coverage around 90%) and from 24h gravimetric samples (filters; annual data coverage around 20-30%). This comparison will demonstrate the feasibility of studying trends of chemical species concentrations from filters despite the relatively low annual data coverage. In Section 3.2, we compare the magnitude of the trend of  $PM_{2.5}$  concentrations at MSY during 2004-2014 (period selected for this study) with the magnitude of trends calculated at the same station over different periods, namely 2002-2010 (the period used in Cusack et al., 2012) and 2002-2014 (representing the largest period of gravimetric  $PM_{2.5}$  measurements available at the time of writing at MSY station). This comparison was performed in order to study the differences in the trends over short periods (9 yr to 13 yr). The gravimetric concentrations of  $PM_{2.5}$  measured at MSY were used with this aim. Then (Section 3.3), we present and discuss the trends at both stations of chemical species in both  $PM_{10}$  and  $PM_{2.5}$  from 24h filter analyses. In the Section 4.0 we discuss the sources of pollutants identified by PMF model in  $PM_{10}$  at both sites. Finally, we present and discuss the trends of  $PM_{10}$  source contributions at BCN and MSY (Section 4.1) providing possible explanations for the observed trends. Some conclusions are reported in Section 5.

#### 3.1 Trends of PM: Comparison between gravimetric and real-time optical measurements

Annual data coverage is an important factor to take into account in order to study trends of a given parameter. The gravimetric PM measurements, from which chemical speciated data are obtained, are typically performed with rather low frequency over one year. In our case the annual data coverage of gravimetric measurements was around 20-30% at both Barcelona and Montseny. In this section we compare the trends of PM

concentrations from gravimetric and real-time optical measurements (Table 1). Given that the trends of the considered  $PM_x$  fractions were linear at both sites ( $NL < 10\%$ ), only results from MK test were reported in Table 1. However, we will show later (*Section 4.1*) that the contributions from specific  $PM_{10}$  pollutant sources from PMF model, mainly those related with anthropogenic activities, showed non-linear (i.e. exponential) decreasing trends, thus mirroring the different effectiveness of the mitigation strategies depending on the source of pollutants considered.

As reported in Table 1, statistically significant decreasing trends were observed for the considered PM size fractions at BCN ( $-2.20 \mu\text{g m}^{-3}/\text{yr}$  with  $p < 0.001$  for  $PM_{10}$  and  $-1.55 \mu\text{g m}^{-3}/\text{yr}$  with  $p < 0.01$  for  $PM_{2.5}$  from OPC measurements), whereas at Montseny only the  $PM_{2.5}$  fraction showed a little significant decreasing trend ( $-0.26 \mu\text{g m}^{-3}/\text{yr}$ ;  $p < 0.1$  from OPC measurements). Total reductions (TR) ranged between 50.4% (OPC  $PM_{10}$  at BCN) to 7.8% (OPC  $PM_{10}$  at MSY) and residual component (RC) was lower than 18% reflecting the goodness of the linear (MK) fit used. It must be noted that the higher p-values, magnitude of the trends and TR observed at BCN compared to MSY was likely due to the change of the measuring station in 2009 in BCN (cf. Fig. 1). Based on the comparison between simultaneous  $PM_x$  chemical speciated data collected at both BCN measurement sites during 1 month (not shown) we concluded that after 2009 the BCN measuring site was less affected by mineral matter and, to a lesser extent, by road traffic emissions both being important sources of PM in Barcelona. In Figure 1 we highlighted the proximity of the BCN measuring station before 2009 to an unpaved parking and different construction works. The effect of the change of the station in BCN in 2009 on  $PM_{10}$  gravimetric measurements was reported in Supporting Information (Figure SI-1). However, despite the change of the station, the comparison between BCN and MSY for specific chemical species and pollutant sources not linked with mineral matter and road traffic emissions was possible.

Table 1 shows that the p-values calculated using gravimetric and OPC measurements was the same despite the different annual data coverage. The differences in the magnitude of the trends were 22% and 24% between gravimetric and OPC  $PM_{10}$  and  $PM_{2.5}$  measurements, respectively, at BCN and 24% and 21%, respectively, at MSY. Relative differences of total reductions (TR) ranged between 24% between gravimetric and OPC  $PM_{10}$  measurements at MSY and 15% for  $PM_{10}$  at BCN. Thus, despite the different data coverage the magnitude of the trends and TR calculated from OPC and gravimetric measurements were rather similar. Other PM mass fractions ( $PM_{1-10}$  and  $PM_{2.5-10}$ ) and PM ratios ( $PM_1/PM_{10}$  and  $PM_{2.5}/PM_{10}$ ) at MSY showed non-statistically significant trends.

### 3.2 Trends of PM: Comparison among different periods

In this study we used the period 2004-2014 for trends analysis given that gravimetric  $PM_{2.5}$  measurements at BCN were available since 2004. Conversely, at MSY  $PM_{2.5}$  gravimetric measurements started in 2002. Figure 2 shows the trends of  $PM_{2.5}$  concentrations at MSY calculated using the MK test for the three different periods.

**ME test was not used here given that the observed trends were linear (NL<10%).** The period 2002-2010 was the period considered in the paper from Cusack et al. (2012) presenting the trends of PM<sub>2.5</sub> gravimetric mass and chemical species at MSY. The period 2002-2014 is the largest period with PM<sub>2.5</sub> filter measurements available at the time of writing. The trend observed at MSY for the PM<sub>2.5</sub> fraction during 2004-2014 confirmed what already observed by Cusack et al. (2012) at the same station for the period 2002 – 2010. In Cusack et al. (2012) the MK test provided a decreasing trend of around -0.66 µgm<sup>-3</sup>/yr at 0.01 significance level (TR = 35%). During the periods 2004 – 2014 and 2002 – 2014 decreasing trends of -0.33 µgm<sup>-3</sup>/yr (p<0.1; TR = 26%) and -0.37 µgm<sup>-3</sup>/yr (p<0.05; TR = 31%), respectively, were observed. Thus, a statistically significant trend for PM<sub>2.5</sub> mass at regional level can be confirmed even considering different periods **thus confirming the effectiveness of mitigation measures together with the effect of the economic crisis in Spain from 2008. However, it should be noted that the statistical significance of the trends observed for the larger periods was lower compared to Cusack et al. (2012). The difference observed in the magnitude of the trends during 2004-2014 compared to the results provided by Cusack et al. (2012) was mainly due to the increase of PM<sub>2.5</sub> mass concentration in 2012 (cf. Figure 2). Chemical PM<sub>2.5</sub> speciated data revealed that this increase was partly driven by organic matter showing a mean annual concentration in 2012 higher by around 20% compared to the 2004-2014 average.**

### 3.3 Trends of chemical species

The trends of the **annual mean** concentrations of chemical species at BCN and MSY are reported in Table 2 (for PM<sub>10</sub>) and Table 3 (for PM<sub>2.5</sub>). Figure 3 (for BCN) and Figure 4 (for MSY) show the trends of chemical species in PM<sub>10</sub>. **In Tables 2 and 3 and Figures 3 and 4 only the species having statistically significant trends were reported.**

**As already noted,** we assume that the change of the station in BCN in 2009 affected the trends of the concentrations of **OC, EC,** Cu, Sn, Sb and Zn (mainly traffic tracers), Al<sub>2</sub>O<sub>3</sub>, Ca, Mg, Ti, Rb, Sr (crustal elements related with both natural and anthropogenic sources) and Fe (traffic and crustal tracer). **These chemical species at BCN were removed from Tables 2 and 3 and from Figure 3.**

**Other species with less local character measured in BCN were instead included in the analysis.** These are SO<sub>4</sub><sup>2-</sup>, NH<sub>4</sub><sup>+</sup>, V, Ni (related with heavy oil combustion in the study area according to source apportionment results, cf. Par. 4), Pb, Cd, and As (related with industrial/metallurgy activities), Na and Cl (sea spray), and NO<sub>3</sub><sup>-</sup>. Although nitrate particles in Barcelona were mainly from traffic, the concentrations of these particles were not strongly affected by the change of the station due to their secondary origin. The MSY station will be considered as reference station given that no location change occurred at this monitoring site during the study period.

**Statistically significant exponential trends (p < 0.01 or 0.001) were mainly observed for the industrial tracers (Pb, Cd, As) in both PM<sub>10</sub> and PM<sub>2.5</sub>. For these elements TR was high and around 50-80% in PM<sub>10</sub> and 67-81%**

in  $PM_{2.5}$ . The RCs were lower than 20% thus suggesting the goodness of the exponential fits used to study the trends of these species. Exponential fits were on average needed indicating that the trends were not gradual and consistent over time and that the effectiveness of the control measures for these pollutants was stronger at the beginning of the period under study (2004-2009 approximately) compared to the end of the period (Figs. 3 and 4). This is also evident by comparing the linear MK fit (dashed black line) with the ME fit (red line) in Figs. 3 and 4. In  $PM_{10}$  the magnitudes of the trends ranged between  $-0.00222 \mu\text{g m}^{-3}/\text{yr}$  (Pb;  $p < 0.001$ ) to  $-3.10\text{E-}5 \mu\text{g m}^{-3}/\text{yr}$  (Cd;  $p < 0.001$ ) at BCN and from  $-0.00031 \mu\text{g m}^{-3}/\text{yr}$  (Pb;  $p < 0.01$ ) to  $-1.12\text{E-}5 \mu\text{g m}^{-3}/\text{yr}$  (Cd;  $p < 0.01$ ) at MSY. In  $PM_{2.5}$  the magnitude of the trends were similar and ranged between  $-0.00163 \mu\text{g m}^{-3}/\text{yr}$  (Pb;  $p < 0.001$ ) and  $-3.11\text{E-}5 \mu\text{g m}^{-3}/\text{yr}$  (Cd;  $p < 0.001$ ) at BCN and between  $-0.00049 \mu\text{g m}^{-3}/\text{yr}$  (Pb;  $p < 0.001$ ) and  $-1.35\text{E-}5 \mu\text{g m}^{-3}/\text{yr}$  (Cd;  $p < 0.001$ ) at MSY. Similar magnitude of the trends for these species in both PM fractions at both sites confirmed the common origin of these elements and the impact at regional scale of industrial sources. For Pb and Cd the characteristic time ( $\tau$ ) of the exponential trends was similar at both sites, whereas for As it was higher due to the slightly less intense exponential downward trend observed for As compared to Cd and Pb. Note that the PMF analysis (cf. Section 4) revealed that the concentrations of As were explained by multiple sources (especially at BCN) whereas the *Industrial/metallurgy* source alone explained more than around 70% of Pb and Cd concentrations (not shown). The implementation of the IPPC Directive in 2008 in Spain is the most probable cause for this downward trend. The decrease observed for Pb, Cd and As may be also attributed to a decrease in the emissions from industrial production (smelters, Querol et al., 2007) at a regional scale around Barcelona.

**The concentrations of V and Ni in Barcelona in both  $PM_{10}$  and  $PM_{2.5}$  fractions showed very similar exponential decreasing trends. Similar characteristic times (around 10-11 yr), TR (around 59-63%) and RC (15-17%) in both fractions suggested the common and mainly fine origin of these two elements. At MSY, V and Ni showed linear trends likely because of the higher distance of the MSY station to the sources of V and Ni (shipping and, before 2008, energy production) compared to BCN. Note also that the NL parameter for BCN V and Ni was around 10-12%, indicating that in this case the exponential fit did not differ very much from the linear one. Total reduction for V and Ni at MSY was around 59-64% and 42-43%, respectively, and RCs were lower than 24%.**

Sn and Cu in  $PM_{10}$  at MSY showed very similar behavior decreasing linearly with time with TR around 36-39% and RC around 16-20%. Decreasing rates of  $-3.65\text{E-}5 \mu\text{g m}^{-3}/\text{yr}$  ( $p < 0.05$ ) and  $-0.00014 \mu\text{g m}^{-3}/\text{yr}$  ( $p < 0.05$ ) were observed in  $PM_{10}$  for Sn and Cu, respectively. In  $PM_{2.5}$ , the concentrations of Sn and Cu decreased markedly compared to  $PM_{10}$  at the rate of  $-0.00084 \mu\text{g m}^{-3}/\text{yr}$  ( $p < 0.001$ ) and  $-0.00026 \mu\text{g m}^{-3}/\text{yr}$  ( $p < 0.01$ ), respectively. This difference could be explained by possible sources of coarser Sn and Cu which reduced the magnitude of the trends in  $PM_{10}$  mass fraction. Sb showed marked decreasing trends in both PM mass fractions compared to Sn and Cu with TR around 62-70%. The magnitude of the trends for Sb were similar in both fractions and around  $-3.57 \div -3.86\text{E-}5 \mu\text{g m}^{-3}/\text{yr}$ . Sb concentrations were better fitted with exponential curves (SE with  $p < 0.01$  in  $PM_{10}$  and DE with  $p < 0.01$  in  $PM_{2.5}$ ). **The DE fit for Sb in  $PM_{2.5}$  had one positive and one negative characteristic time,**

**the latter needed to explain the slight increase in Sb concentrations at the end of the considered period.** The marked decreasing trend observed for Sb compared to other traffic tracers could be explained by a progressive reduction of Sb contained in the vehicle brakes. Cr did not show a statistically significant trend in both PM fractions.

Sulfate ( $\text{SO}_4^{2-}$ ) and ammonium ( $\text{NH}_4^+$ ) particles concentrations showed very similar behavior in  $\text{PM}_{2.5}$  and  $\text{PM}_{10}$  size fractions due to their fine nature. In BCN the magnitude of the trends were  $-0.37868 \mu\text{g m}^{-3}/\text{yr}$  ( $p < 0.001$ ) and  $-0.11095 \mu\text{g m}^{-3}/\text{yr}$  ( $p < 0.001$ ) for  $\text{SO}_4^{2-}$  and  $\text{NH}_4^+$ , respectively, in  $\text{PM}_{10}$  and  $-0.32778 \mu\text{g m}^{-3}/\text{yr}$  ( $p < 0.001$ ) and  $-0.12701 \mu\text{g m}^{-3}/\text{yr}$  ( $p < 0.001$ ), respectively, in  $\text{PM}_{2.5}$ . The trends were SE with very similar characteristic times (9.64-9.81 yr in  $\text{PM}_{10}$  and 9.69-10.53 yr in  $\text{PM}_{2.5}$ ), TR (64-65% in  $\text{PM}_{10}$  and 61-64% in  $\text{PM}_{2.5}$ ) and RC (12-14% in  $\text{PM}_{10}$  and 9-15% in  $\text{PM}_{2.5}$ ). At MSY the magnitude of the trends of  $\text{SO}_4^{2-}$  and  $\text{NH}_4^+$  and their statistical significance were lower compared to BCN in both fractions. Moreover, at MSY the trends were linear for  $\text{SO}_4^{2-}$  in both fractions (as for V and Ni). These differences could be explained by the distance of MSY to direct specific sources of sulfate, such as shipping, compared to BCN, thus slightly reducing the magnitude and the statistical significance of the trend of  $\text{SO}_4^{2-}$  at regional level. It is also interesting to note the similitude between the characteristic times of the exponential fits for V and Ni and  $\text{SO}_4^{2-}$  in both PM fractions at BCN suggesting the main common origin of these chemical species. Possible reasons for the observed reduction in the concentrations of ambient sulfate in and around Barcelona will be discussed later.

Fine  $\text{NO}_3^-$  (Table 3) showed statistically significant SE trends similar at both sites with  $p < 0.001$ , TR around 73-82%, RC around 16-21% and characteristic times around 5.8-7.6 yr. In  $\text{PM}_{10}$  the TR were lower and around 54-64% and the fits were linear at MSY and SE at BCN. The SE fit at BCN in  $\text{PM}_{10}$  provided a characteristic time around 9.8 yr, higher compared to  $\tau$  obtained for the fine mode because fine  $\text{NO}_3^-$  had a more pronounced downward trend compared to  $\text{PM}_{10}$   $\text{NO}_3^-$ .

**For the mineral species ( $\text{Al}_2\text{O}_3$ , Ca, Fe) linear (with the exception of  $\text{Al}_2\text{O}_3$  in  $\text{PM}_{2.5}$  which was SE) and statistically significant decreasing trends were detected at MSY. On average the TR was higher in the fine fraction, ranging from 50% for Ca to 66% for  $\text{Al}_2\text{O}_3$ , compared to  $\text{PM}_{10}$  (6-38% cf. Table 2). Downward decreasing trend for crustal material in  $\text{PM}_{2.5}$  at MSY was also reported by Cusack et al. (2012) for the period 2002 – 2010 and by Querol et al. (2014) for the period 2001 – 2012. These trends were probably driven by weather conditions associated with negative NAO index (iNAO) that could be the cause for this slight reduction observed in crustal material. Pey et al. (2013) found a correlation between iNAO (calculated between June and September) and the contribution of Saharan dust to  $\text{PM}_{10}$  mass in NE of Spain showing that the more negative is the iNAO the lower is the dust contribution to PM. The iNAO was unusually negative during the period 2008 – 2012 (<http://www.cpc.ncep.noaa.gov/products/precip/CWlink/pna/norm.nao.monthly.b5001.current.ascii>) thus likely contributing to explain the observed trends of crustal elements. Moreover, negative NAO can favour the presence of fronts that can sweep the Iberian Peninsula from West to East causing higher wind and less stagnant conditions thus favouring the dispersion of pollutants. In addition, as suggested by Cusack et al (2012),**

it could also be hypothesised that some part of the crustal material measured at MSY is a product of the construction industry. The construction industry in Spain has been especially affected by the current economic recession, and crustal material produced by this industry may have contributed to the crustal load in PM<sub>2.5</sub>. For example, the number of home construction works in Barcelona during 2008 – 2014 (from the beginning of the economic crisis; mean number of works = 1281) reduced by around 75% compared to the period 2000 – 2007; mean number of works = 5187) (<http://www.bcn.cat/estadistica/castella/dades/timm/construccio/index.htm>). The fact that the total reduction calculated for mineral elements reported in Tables 2 and 3 was higher in PM<sub>2.5</sub> compared to PM<sub>10</sub> could corroborate this latter hypothesis.

Finally, Na concentrations showed linear decreasing trends at both sites, with the exception of PM<sub>10</sub> Na at MSY. Other species at MSY such as OC and EC did not show statistically significant trends. Consider that the concentrations of EC at MSY are very low and around at 0.2-0.3 µg/m<sup>3</sup> as annual mean. Both anthropogenic activity and biomass burning were expected to contribute to this chemical specie. Concerning OC the lack of trend was probably due to the contribution from biogenic sources to the concentration of this specie at regional level.

#### 4. PMF source profiles and contributions

Eight and seven sources were detected at BCN and MSY, respectively, in PM<sub>10</sub> from PMF model. The absolute and relative contributions of these sources to the measured PM<sub>10</sub> mass are reported in Figure 5. The chemical profiles of the detected sources were reported in Supporting Information (Figure SI-2).

Some of these sources were common at both BCN and MSY. These are: **Secondary Sulfate** (secondary inorganic source traced by SO<sub>4</sub><sup>2-</sup> and NH<sub>4</sub><sup>+</sup> and contributing 3.95 µg/m<sup>3</sup> (23.7%) and 4.67 µg/m<sup>3</sup> (13.7%) at MSY and BCN, respectively), **Secondary nitrate** (secondary inorganic source traced by NO<sub>3</sub><sup>-</sup> and NH<sub>4</sub><sup>+</sup> and contributing 1.31 µg/m<sup>3</sup> (7.9%) and 4.45 µg/m<sup>3</sup> (13.1%) at MSY and BCN, respectively), *V-Ni bearing* source (traced mainly by V, Ni and SO<sub>4</sub><sup>2-</sup> it represents the direct emissions from heavy oil combustion and contributed 0.71 µg/m<sup>3</sup> (4.3%) and 3.32 µg/m<sup>3</sup> (9.8%) at MSY and BCN, respectively), *Mineral* (traced by typical crustal elements such as Al, Ca, Ti, Rb, Sr and contributing 2.70 µg/m<sup>3</sup> (16.2%) and 4.61 µg/m<sup>3</sup> (13.6%) at MSY and BCN, respectively), *Aged marine* (traced by Na and Cl mainly with contributions from SO<sub>4</sub><sup>2-</sup> and NO<sub>3</sub><sup>-</sup> and contributing 1.76 µg/m<sup>3</sup> (10.6%) and 5.73 µg/m<sup>3</sup> (16.9%) at MSY and BCN, respectively). Sources detected at MSY but not at BCN were: *Industrial/Traffic* source (traced by EC, OC, Cr, Cu, Zn, As, Cd, Sn, Sb and Pb it includes mixed contributions from anthropogenic sources such as road traffic and metallurgic industries and contributed 1.43 µg/m<sup>3</sup> (8.6%)) and *Aged organics* (traced mainly by OC and EC with maxima in summer indicating mainly a biogenic origin and contributing 3.78 µg/m<sup>3</sup> (22.7%)). The ratio OC:EC in the *Industrial/Traffic* and *Aged organic* source profiles at MSY were 4.2 and 11.7, respectively, thus indicating a strong influence of aged particles in the latter source with the former source being more fresh. The statistic of the OC:EC ratio based on chemical data at MSY is reported

in Supporting Information (Figure SI-3). Mean and median values of OC:EC ratio at MSY were 9.1 and 7.8, respectively.

Finally, some sources were detected at BCN but not at MSY: *traffic* (traced by  $C_{nm}$ , Cr, Cu, Sb and Fe mainly and contributing  $5.14 \mu\text{g}/\text{m}^3$  (15.1%)), *road/work resuspension* (traced by both crustal elements, mainly Ca, and traffic tracers such as Sb, Cu and Sn and contributing  $4.25 \mu\text{g}/\text{m}^3$  (12.5%)) and *Industrial/metallurgy* (traced by Pb, Cd, As and Zn and contributing  $0.96 \mu\text{g}/\text{m}^3$  (2.8%).

A sensitivity study was performed in order to better interpret the PMF sources at BCN. In fact, for the period 2007 – 2014 separate OC and EC concentration measurements were available and a PMF was performed. The comparison between the PMF source contributions obtained using the period 2007-2014 (separate OC and EC measurements) and the whole period (2004-2014;  $C_{nm}$  (non-mineral carbon) available) is reported in Supporting Information (Figure SI-4). As reported in Figure SI-4 the differences in source contribution and  $R^2$  ranged between -3% (*Mineral* source) and +20% (*Industrial* source) and 0.894 to 0.997, respectively, thus confirming the correct interpretation of the 2004-2014 PMF sources where  $C_{nm}$  was used. The OC:EC ratio in the *Traffic* source from 2007-2014 PMF was 1.70 (cf. Figure SI-5) whereas the mean and median OC:EC ratio from chemistry data were 2.5 and 2.3, respectively, thus being in agreement with the contribution of fresh particles from *Traffic* source at BCN.

#### 4.1 Trends of annual $\text{PM}_{10}$ source contributions

Figures 6 and 7 and Table 4 show the results from MK or ME test applied to the annual averages of  $\text{PM}_{10}$  source contributions at BCN and MSY. As already noted we cannot study trends for *Traffic*, *Road/work resuspension* and *Mineral* source contributions at BCN because of the change of the station location in 2009. The contributions that showed statistically significant downward trends at both stations were from *Secondary sulfate*, *Secondary nitrate*, and *V-Ni bearing* sources ( $p < 0.001$  or  $p < 0.01$ ). Moreover, statistically significant decreasing trends were observed for the *Industrial/Traffic* ( $p < 0.01$ ) and *Mineral* ( $p < 0.1$ ) source contributions at MSY and the *Industrial/metallurgy* source ( $p < 0.001$ ) at BCN. These sources were mostly linked with anthropogenic activities and the observed decreasing trends confirmed the effectiveness of pollution control measures together with the possible effect of the economic crisis in Spain from 2008. Conversely, the contributions from sources mostly linked with natural processes such as *Aged Marine* (at both BCN and MSY) and *Aged Organic* (at MSY) did not show statistically significant trends.

The trends of the *Secondary sulfate* source contributions were DE and SE at BCN and MSY, respectively, thus the decrease over time of this source contribution was not gradual and monotonic. Overall the observed decreasing trends at both stations may be attributed to the legislation that came into force in 2007-2008 in Spain, the EC Directive on Large Combustion Plants, which resulted in the application of flue gas desulfurization (FGD) systems in a number of large facilities in 2007-2008 in Spain. Figure 8 shows the sharp decreases after



2007 observed for the national SO<sub>2</sub> and NO<sub>x</sub> emissions mostly from power generation (MAGRAMA, 2013; Querol et al., 2014). In BCN the two characteristic times (one low and the other high, cf. Table 4) of the DE fit indicated a strong decrease of the **Secondary sulfate** source contribution at the beginning of the period. Moreover, this decrease was sharper compared to MSY where SE fit was used. This difference was mostly due to the ban of heavy oils and petroleum coke for power generation around Barcelona from 2007. The effects of this AQ Regional Plan were likely more effective in BCN compared to MSY thus explaining the two different exponential fits used. Overall, for the **Secondary sulfate** source contributions the TRs were rather high around 53% at MSY and 67% at BCN with RC ranging from 16% (BCN) to 21% (MSY). **The fact that the trend of the Secondary sulfate source contribution was exponential likely suggested the attainment of a lower limit and indicated a limited scope for further reduction of SO<sub>2</sub> emissions in our region. In fact, it has been estimated that the maximum in EU will be a further 20% reduction through measures in industry, residential and commercial heating and reduced agricultural waste burning (UNECE, 2016). Conversely, in Eastern European countries the scope for reduction is much greater and around 60% (UNECE, 2016).**

The trends of the **Secondary nitrate** source contributions were SE at both stations with very similar  $\tau$  (8.96 yr – 8.59 yr), TR (67-69 %) and RC (13-17%). The decrease observed for the contribution from the **Secondary Nitrate** source was related to the reduction in ambient NO<sub>x</sub> concentrations (Figures 8 and 9). Figure 9 shows the levels of tropospheric NO<sub>2</sub> column from 2005 to 2014 in South Europe from NASA NO<sub>2</sub> OMI level3 plotted using the Giovanni online data system (Acker and Leptoukh, 2007). In Spain it can be observed a general decrease of the concentrations of columnar NO<sub>2</sub> at regional level. Overall, the implementation of European directives affecting industrial and power generation emissions as well as the increase of the proportion of energy produced from renewable sources (cf. Figure 10 for Spain), among others, produced a significant reduction of SO<sub>2</sub> and NO<sub>x</sub> emissions. **Around Barcelona the observed decreases were also attributed to the decrease of NO<sub>x</sub> emissions mainly from the five power generation plants around the city. Moreover, the implementation during the 2008-2012 Regional AQ Plan of SCRT (continuously regenerating PM traps with selective catalytic reduction for NO<sub>2</sub>) and the hybridization and shift to natural gas engines of the Barcelona's bus fleet may have had an influence in the observed reductions.**

**The decreasing trends ( $p < 0.01$ ) of the V-Ni bearing source contributions were SE and L at BCN and MSY, respectively, reflecting the trends observed at both stations for the concentrations of V and Ni (cf. Table 2). At BCN the characteristic times ( $\tau$ ) was very similar to the characteristic times calculated for PM<sub>10</sub> V and Ni (cf. Table 2) which were the main tracers of this source. TRs were around 61% at BCN and 64% at MSY and RCs were similar (19-25 %). The observed decrease in the V-Ni bearing source contribution was mainly attributed to the ban of the use of heavy oils and petroleum coke for power generation from 2008 in Spain.**

**The Industrial/Metallurgy source contribution at BCN decreased exponentially (SE) at the rate of -0.10  $\mu\text{gm}^3/\text{yr}$  ( $p < 0.001$ ) reflecting the SE decreasing trends observed for the main tracers of this pollutant source (Pb, Cd and As; cf. Table 2). The decrease of industrial emissions was mainly attributed to the implementation of**

IPPC (Integrated Pollution Prevention and Control) Directives. Moreover, the observed decrease may be attributed to a decrease in the emissions from industrial production (smelters, Querol et al., 2007) at a regional scale around Barcelona. Also, the financial crisis, whose impact on industrial production and use of fuels is evident since October 2008 also contributed to the observed trend. TR and RC for the *Industrial* source contributions at BCN were 65% and 16%, respectively. As for the contributions from *Secondary sulfate* and *nitrate* sources, the exponential trend observed for the *Industrial/Metallurgy* source contribution suggested the attainment of a lower limit. As evidenced in Fig. 6 the contribution from this source from 2010 was quite low and rather constant.

The contribution of the *Industrial/Traffic* source at MSY showed similar magnitude of the trend ( $-0.11 \mu\text{g m}^{-3}/\text{yr}$  with  $p < 0.01$ ) compared to the BCN *Industrial* contribution trend, being both sources traced mostly by the same industrial tracers. The trend of this source at MSY was linear with TR and RC of 56% and 13%, respectively, similar to those calculated for *Industrial* source contribution at BCN.

Finally, the *Mineral* source contribution at MSY showed linear little significant decreasing trend ( $p < 0.1$ ) in agreement with what observed at the same station by Cusack et al. (2012). As already noted in Section 3.3, this negative trend could be due to both a possible decrease of the emissions of finer anthropogenic mineral species from specific sources such as cement and concrete production and construction works and unusual weather conditions reducing Saharan dust contribution to PM and resuspension of dust.

In order to further interpret the observed trends, annual data on the annual National Energy Consumption (NECo) from different energy sources (MINETUR, 2013) were also evaluated (Figure 10). Overall, the primary energy consumption in Spain (NECo statistical data for Spain-MINETUR, 2013) increased from 2004 to 2007 and decreased from 2007 with marked decrease in 2009. Since 2009, the energy consumption indicator remained rather low and constant until 2012 when an additional decrease in 2013 and 2014 was observed. Oil consumption was fairly constant during 2004–2007 showing an important decrease during 2008–2014. This trend was probably governed by the fuel consumption for traffic road. Coal consumption remained constantly high from 2004 to 2007 whereas, as for the emissions of  $\text{SO}_2$  (Fig. 8), a sharp decrease occurred from 2007. However, in the period 2011–2014 there was an important increase of coal consumption leading to an average consumption similar to the year 2008. However, the implementation of FGD systems contributed to maintain  $\text{SO}_2$  at low concentrations, even in the coal production regions in Spain (cf. Querol et al., 2014). The hydroelectric generation was rather specular to coal consumption. For example, the increase in 2010 of hydroelectric consumption, due to high rainfall rate, mirrored the decrease in the coal consumption observed the same year. Finally, renewable energy consumption increased by 440% from 2004 to 2014, with a gradual growth in the NECo.

## 5.0 Conclusions

PM chemical speciated data collected at two twin stations in NE of Spain (**Barcelona: urban background station and Montseny: regional background station**) during 2004 – 2014 were used to study trends of source contributions from PMF analysis and of chemical species concentrations. Despite the fact the trends of different PM fractions (**PM<sub>2.5</sub> and PM<sub>10</sub>**) were linear during the period under study, the trends of specific chemical elements and source contributions were exponential demonstrating the different effectiveness and time of implementation of different reduction strategies on specific pollutant sources. **Statistically significant exponential trends (p < 0.01 or 0.001) were mainly observed for the industrial tracers (Pb, Cd, As) in both PM<sub>10</sub> and PM<sub>2.5</sub> and at both sites. The concentrations of V and Ni showed exponential trends in BCN and linear trends at MSY likely because of the higher distance of the MSY station to the sources of V and Ni (shipping and, before 2008, energy production) compared to BCN. Traffic tracers at MSY (Sn, Cu) showed very similar linear decreasing trends with higher magnitude of the trends in the fine (PM<sub>2.5</sub>) fractions compared to PM<sub>10</sub> likely because of possible sources of coarser Sn and Cu reducing the magnitude of the trends in the PM<sub>10</sub> mass fraction. Sb at MSY showed marked exponential decreasing trends compared to other traffic tracers (Cu and Sn) which could be explained by a possible progressive reduction of Sb content in vehicle brakes. Secondary inorganic aerosols (SO<sub>4</sub><sup>2-</sup>, NO<sub>3</sub><sup>-</sup> and NH<sub>4</sub><sup>+</sup>) also showed marked decreasing trends (both linear and exponential) in both fractions and at both sites. However, in general the magnitude of the trends for these species and their statistical significance were higher at BCN compared to MSY.**

**The PM<sub>10</sub> source contributions** that showed statistically significant downward trends at both Barcelona (BCN; UB) and Montseny (MSY; RB) were from **Secondary sulfate**, **Secondary nitrate**, and *V-Ni bearing* sources. For these source contributions the decreasing trends were exponential indicating that the trends were not gradual and consistent over time and that the effectiveness of the control measures for these pollutants was stronger at the beginning of the period under study (2004-2009 approximately) compared to the end of the period (Figs. 3 and 4). Statistically significant decreasing trends were observed for the *Industrial/Traffic* and *Mineral* sources at MSY and the *Industrial/metallurgy* source at BCN. These sources were mostly linked with anthropogenic activities and the observed decreasing trends confirmed the effectiveness of pollution control measures implemented at EU or regional/local levels. The economic crisis which started in 2008 in Spain also contributed to the observed trends. **Conversely, the contributions from sources mostly linked with natural processes such as Aged Marine (at both BCN and MSY) and Aged Organic (at MSY) did not show statistically significant trends.** The general trends observed for the calculated PMF source contributions well reflected the trends observed for the chemical tracers of these pollutant sources. The decrease in the **Secondary sulfate** source contribution was mainly attributed to the EC Directive on Large Combustion Plants implemented from 2008 in Spain, resulting in the application of fuels gas desulfurization (FGD) systems in a number of large facilities. **Moreover, according to the 2008 Regional AQ Plan, the use of heavy oils and petroleum coke for power generation was forbidden around Barcelona from 2008 in favour of natural gas. As a consequence, a decrease of the contributions from the V-Ni bearing source at both sites was also observed.** The decrease observed for

the contribution of the **Secondary Nitrate** source was mainly due to the reduction in ambient NO<sub>x</sub> concentrations. In Spain a general decrease of the concentrations of NO<sub>2</sub> at regional level was observed and it was mainly related with the lower energy consumption related with the financial crisis. The decrease of nitrates concentrations and **Secondary nitrate** source contributions around Barcelona was also attributed to the decrease of NO<sub>x</sub> emissions from the five power generation plants around the city. Moreover, a Regional AQ Plan implementing the SCRT (continuously regenerating PM traps with selective catalytic reduction for NO<sub>2</sub>) and the hybridization and shift to natural gas engines of the Barcelona's bus fleet may have had also an influence in NO<sub>x</sub> ambient concentrations. **The Industrial/Metallurgy source contribution at BCN decreased exponentially reflecting the exponential trends observed for the main tracers of this pollutant source (Pb, Cd and As). The implementation of IPPC (Integrated Pollution Prevention and Control) Directives together with a decrease in the emissions from industrial production (smelters) at a regional scale around Barcelona explained the observed trends.** Overall, the magnitude of the decreasing trends of the contributions of the pollutant sources were higher at BCN compared to MSY likely because of the proximity of the BCN measurement site to anthropogenic pollutant sources compared to the MSY site. **The results presented in this work clearly confirm the beneficial effect of the AQ measures taken in recent years in Europe. However, the WHO limit values of specific pollutants, PM<sub>10</sub> and PM<sub>2.5</sub> among these, are still exceeded especially at urban level and industrial hotspots. To meet the WHO guide levels important actions are still required for the next decade and the interpretation of past air quality trends may yield relevant outcomes for planning further cost-effective actions. We would like to highlight that a non-linear approach to trend studies is very attractive given that some air pollutants reported in this work showed not gradual-with-time reductions. Conversely, for specific pollutant source-contribution/concentration in our region, the decreasing trend was less steep at the end of the period compared to the beginning thus likely indicating the attainment of a lower limit. This was the case for example for the Secondary sulfate source contribution decreasing exponentially from 2004 to 2014 thus likely indicating a limited scope for further reduction of SO<sub>2</sub> emissions in our region.**

#### **Acknowledgments.**

This work was supported by the MINECO (Spanish Ministry of Economy and Competitiveness), the MAGRAMA (Spanish Ministry of Agriculture, Food and Environment), the Generalitat de Catalunya (AGAUR 2014 SGR33 and the DGQA) and FEDER funds under the PRISMA project (CGL2012-39623- C02/00). The research leading to these results has received funding from the European Union's Horizon 2020 research and innovation programme under grant agreement No 654109 and previously from the European Union Seventh Framework Programme (FP7/2007-2013) under grant agreement n° 262254. Marco Pandolfi is funded by a Ramón y Cajal Fellowship (RYC-2013-14036) awarded by the Spanish Ministry of Economy and Competitiveness. NO<sub>2</sub> map analyses and visualizations used in this paper were produced with the Giovanni online data system, developed and maintained by the NASA GES DISC. The authors would like to express their gratitude to D. C. Carslaw and K.

Ropkins for providing the Openair software used in this paper (Carslaw and Ropkins, 2012; Carslaw, 2012).

## Bibliography

Acker, J. G. and Leptoukh, G.: *Online Analysis Enhances Use of NASA Earth Science Data*, Eos, Trans. AGU, 88, 2, 14-17, 2007.

Alastuey, A., Minguillón, M.C., Pérez, N., Querol, X., Viana, M. and de Leeuw, F.: *PM<sub>10</sub> Measurement Methods and Correction Factors: 2009 Status Report*, ETC/ACM Technical Paper 2011/21, 2011.

Amato, F., M. Pandolfi, A. Escrig, X. Querol, A. Alastuey, J. Pey, N. Perez, P.K. Hopke, *Quantifying road dust resuspension in urban environment by Multilinear Engine: A comparison with PMF2*, Atmospheric Environment. 43 - 17, pp. 2770 - 2780. 06/2009, 2009.

Barnpadimos, I., Keller, J., Oderbolz, D., Hueglin, C., Prevot, A.S.H.: *One decade of parallel fine (PM<sub>2.5</sub>) and coarse (PM<sub>10</sub>-PM<sub>2.5</sub>) particulate matter measurements in Europe: trends and variability*, Atmos Chem Phys, 12, 3189–3203, <http://dx.doi.org/10.5194/acp-12-3189-2012>, 2012

Carslaw, D.C., *The OpenAir manual — open-source tools for analysing air pollution data*, Manual for version 0.5-16, King's College, London, 2012.

Carslaw, D.C., Ropkins, K.: *OpenAir — an R package for air quality data analysis*, Environ Model Softw, 27–28, 52–61, 2012

**Cavalli, F., Viana, M., Yttri, K. E., Genberg, J., and Putaud, J.-P.: Toward a standardised thermal-optical protocol for measuring atmospheric organic and elemental carbon: the EUSAAR protocol, Atmos. Meas. Tech., 3, 79-89, doi:10.5194/amt-3-79-2010, 2010.**

Cusack, M., Alastuey, A., Perez, N., Pey, J., Querol, X.: *Trends of particulate matter (PM<sub>2.5</sub>) and chemical composition at a regional background site in the Western Mediterranean over the last nine years (2002–2010)*, Atmos Chem Phys, 12, 8341–8357 <http://dx.doi.org/10.5194/acp-12-8341-2012>, 2012.

EEA: European Environmental Agency Air quality in Europe — 2013 report, EEA report 9/2013, Copenhagen, 1725-9177, [107 pp. <http://www.eea.europa.eu/publications/air-quality-in-europe-2013>], 2013.

EEA: European Environmental Agency Air quality in Europe — 2015 report, *Many Europeans still exposed to harmful air pollution. Air pollution is the single largest environmental health risk in Europe*, EEA report 11/2015, Copenhagen, 1-7, [<http://www.eea.europa.eu/media/newsreleases/many-europeans-still-exposed-to-air-pollution-2015>], 2015.

- Escrig, A., Monfort, E., Celades, I., Querol, X., Amato, F., Min guillon, M. C., and Hopke, P. K.: Application of optimally scaled target factor analysis for assessing source contribution of ambi ent PM10, *J. Air Waste Manage.*, 59(11), 1296–1307, 2009.
- Gilbert, R.O.: *Statistical Methods for Environmental Pollution Monitoring*, Wiley, NY, 1987.
- Guerreiro, C., Leeuw, F. de, Foltescu, V., Horálek, J., & European Environment Agency: *Air quality in Europe 2014 report*, Luxembourg: Publications Office. <http://bookshop.europa.eu/uri?target=EUB:NOTICE:THAL14005:EN:HTML>, 2014
- Harrison, R.M., Stedman, J., Derwent, D.: *New directions: why are PM10 concentrations in Europe not falling?*, *Atmos Environ*, 42, 603–606, 2008.
- Henschel, S., Querol, X., Atkinson, R., Pandolfi, M., Zeca, A., Le Tertre, A., Analitis, A., Katsouyanni, K., Chanel, O., Pascal, M., Bouland, C., Haluza, D., Medina, S., Goodman, P.G.: *Ambient air SO2 patterns in 6 European cities*, *Atm. Env.*, 79, 236 - 247. 11/2013, 2013.
- Henschel, S., Le Tertre, A., Atkinson, R.W., Querol, X., Pandolfi, M., Zeka, A., Haluza, D., Antonis, A., Katsouyanni, K., Bouland, C., Pascal, M., Medina, S., Goodman, P.G.: *Trends of nitrogen oxides in ambient air in nine European cities between 1999 and 2010*, *Atm. Env.* 117, 234 - 241. 09/2015, 2015.
- Kendall, M.G.: *Rank Correlation Methods*, 4th edition, Charles Griffin, London, 1975.
- MAGRAMA. Inventario Nacional de Emisiones de Contaminantes a la Atmósfera. Ministerio de Agricultura, Alimentación y Medio Ambiente del Gobierno de España. <http://www.magrama.gob.es/ca/calidad-y-evaluacion-ambiental/temas/sistemaespanol-de-inventario-sei/>, 2013.
- Mann, H.B.: Non-parametric tests against trend, *Econometrica* 13:163-171, 1945.
- MINETUR. Ministerio de Industria, Energía y Turismo. Gobierno de España: energy statistics and balances. <http://www.minetur.gob.es/energia/balances/Balances/Paginas/CoyunturaTrimestral.aspx>, 2013.
- Paatero, P. and Tapper, U.: *Positive Matrix Factorization: a non negative factor model with optimal utilization of error estimates of data values*, *Environmetrics*, 5, 111–126, 1994.
- Paatero, P.: *Least squares formulation of robust non-negative factor analysis*, *Chemometr. Intell. Lab.*, 37, 23–35, 1997.
- Paatero, P., Hopke, P. K., Song, X., and Ramadan, Z.: *Understanding and controlling rotations in factor analytic models*, *Chemometrics and Intelligent Laboratory Systems*, 60(1–2), 253–264, 2002.
- Paatero, P. and Hopke, P. K.: *Discarding or downweighting high noise variables in factor analytic models*, *Anal. Chim. Acta*, 490, 277–289, doi:10.1016/s0003-2670(02)01643-4, 2003.

Paatero P.: User's guide for positive matrix factorization programs PMF2 and PMF3, Part1: tutorial. University of Helsinki, Helsinki, Finland, 2004.

Paatero, P., Hopke, P. K., Begum, B. A., and Biswas, S. K.: *A graphical diagnostic method for assessing the rotation in factor analytical models of atmospheric pollution*, *Atmos. Environ.*, 39, 193–201, doi:10.1016/j.atmosenv.2004.08.018, 2005.

Pandolfi, M., Cusack, M., Alastuey, a. and Querol, X.: Variability of aerosol optical properties in the Western Mediterranean Basin, *Atmos. Chem. Phys.*, 11(15), 8189–8203, doi:10.5194/acp-11-8189-2011, 2011.

Pandolfi, M., F. Amato, C. Reche, A. Alastuey, R. P. Otjes, M. J. Blom, X. Querol, *Summer ammonia measurements in a densely populated Mediterranean city*, *Atmospheric Chemistry and Physics*. 12, pp. 7557 - 7575. 08/2012, 2012.

Pandolfi, M., G. Martucci, X. Querol, A. Alastuey, F. Wilsenack, S. Frey, C.D. O'Dowd, M. Dall'Osto, *Continuous atmospheric boundary layer observations in the coastal urban area of Barcelona during SAPUSS*, *Atmospheric Chemistry and Physics*. 13 - 9, pp. 4983 - 4996. 05/2013, 2013.

Pandolfi, M., Querol, X., Alastuey, A., Jimenez, J. L., Jorba, O., Day, D., Ortega, A., Cubison, M. J., Comerón, A., Sicard, M., Mohr, C., Prévôt, A. S. H., Minguillón, M. C., Pey, J., Baldasano, J. M., Burkhardt, J. F., Seco, R., Peñuelas, J., van Drooge, B. L., Artiñano, B., Di Marco, C., Nemitz, E., Schallhart, S., Metzger, A., Hansel, A., Lorente, J., Ng, S., Jayne, J. and Szidat, S.: Effects of sources and meteorology on particulate matter in the Western Mediterranean Basin: An overview of the DAURE campaign, *J. Geophys. Res. Atmos.*, 119(8), 4978–5010, doi:10.1002/2013JD021079, 2014.

Pérez, N., Pey, J., Castillo, S., Viana, M., Alastuey, A. and Querol, X.: Interpretation of the variability of levels of regional background aerosols in the Western Mediterranean, *Sci. Total Environ.*, 407(1), 527–540, doi:10.1016/j.scitotenv.2008.09.006, 2008.

Pey, J., Pérez, N., Querol, X., Alastuey, A., Cusack, M. and Reche, C.: Intense winter atmospheric pollution episodes affecting the Western Mediterranean., *Sci. Total Environ.*, 408(8), 1951–9, doi:10.1016/j.scitotenv.2010.01.052, 2010.

Pey, J., Querol, X., Alastuey, A., Forastiere, F., and Stafoggia, M.: African dust outbreaks over the Mediterranean Basin during 2001–2011: PM10 concentrations, phenomenology and trends, and its relation with synoptic and mesoscale meteorology, *Atmos. Chem. Phys.*, 13, 1395-1410, doi:10.5194/acp-13-1395-2013, 2013.

Querol, X., Viana, M., Alastuey, A., Amato, F., Moreno, T., Castillo, S., Pey, J., de la Rosa, J., Artiñano, B., Salvador, P., García Dos Santos, S., Fernández-Patier, R., Moreno-Grau, S., Negral, L., Minguillón, M.C., Monfort,

E., Gil, J.I., Inza, A., Ortega, L.A., Santamaría, J.M., Zabalza, J.: Source origin of trace elements in PM from regional background, urban and industrial sites of Spain, *Atm. Env.*, 41, 7219-7231, 2007.

Querol, X., Alastuey, A., Moreno, T., Viana, M.M., Castillo, S., Pey, J., Rodríguez, S., Artiñano, B., Salvador, P., Sánchez, M., Garcia Dos Santos, S., Herce Garraleta, M.D., Fernandez-Patier, R., Moreno-Grau, S., Negral, L., Minguillón, M.C., Monfort, E., Sanz, M.J., Palomo-Marín, R., Pinilla-Gil, E., Cuevas, E., de la Rosa, J., Sánchez de la Campa, A.: *Spatial and temporal variations in airborne particulate matter (PM10 and PM2.5) across Spain 1999–2005*, *Atm. Env.*, 42, 3694–3979, 2008.

Querol, X., M. Viana, T. Moreno, A. Alastuey, J. Pey, F. Amato, M. Pandolfi, et al., *Scientific bases for a National Air Quality Plan* (in Spanish), Colección Informes CSIC, 978-84-00-09475-1, 3, 2012.

Querol, X., Alastuey, A., Pandolfi, M., Reche, C., Pérez, N., Minguillón, M.C., Moreno, T., Viana, M., Escudero, M., Orio, A., Pallarés, M., Reina, F.: *2001–2012 trends on air quality in Spain*, *Science of The Total Environment*, 490, 957–969, doi:10.1016/j.scitotenv.2014.05.074, 2014

Salmi, T., Maata, A., Antilla, P., Ruoho-Airola, T., Amnell, T.: *Detecting trends of annual values of atmospheric pollutants by the Mann Kendall test and Sen's slope estimates – the Excel template application* Makesens, Finnish Meteorological Institute, Helsinki, Finland, 35 pp, 2002.

Salvador P., Artiñano B., Viana M., Alastuey A., Querol X.: *Evaluation of the changes in the Madrid metropolitan area influencing air quality: analysis of 1999-2008 temporal trend of Particulate Matter*, *Atmos. Environ.*, 57, 175-185, 2012.

Sen, P.K., *Estimates of regression coefficient based on Kendall's tau*, *J Am Stat Assoc*, 63, 1379–1389, 1968

Shatalov V., Ilyin I., Gusev A., Rozovskaya O., Travnikov O.: *Heavy Metals and Persistent Organic Pollutants: development of multi-scale modeling and trend analysis methodology*. EMEP/MSC-E Technical report 1/2015, 2015.

Smith, D.M.: *Computing single parameter transformations*, *Communications in Statistics - Simulation and Computation*, 32, 605-618, 2002.

Theil, H.: *A rank invariant method of linear and polynomial regression analysis, I, II, III*, *Proceedings of the Koninklijke Nederlandse Akademie Wetenschappen, Series A — Mathematical Sciences*, 386–392, 521–525, 1397–1412, 1950.

**UNECE: Towards Cleaner Air. Scientific Assessment Report. EMEP Steering Body and Working Group on Effects of the Convention on Long-Range Transboundary Air Pollution, Oslo. xx+50pp, Eds. Maas, R., P. Grennfelt, [www.unece.org/environmental-policy/conventions/envlrtp/welcome/publications.html](http://www.unece.org/environmental-policy/conventions/envlrtp/welcome/publications.html), 2016.**



**Table 1:** Trends of different PM mass fractions from gravimetry (grav) and optical (OPC) measurements at BCN (bold italic) and MSY (2004-2014). TR (%) = Total Reduction; RC (%) = Residual Component. Significance of the trends following the Mann-Kendall test: \*\*\* (p-value < 0.001), \*\* (p-value < 0.01), \* (p-value < 0.05), + (p-value < 0.1).

| PM <sub>x</sub>           | PM <sub>x</sub>                        |                                        | Mann-Kendall fit |                                   |             |             |
|---------------------------|----------------------------------------|----------------------------------------|------------------|-----------------------------------|-------------|-------------|
|                           | Conc.<br>2004<br>(µg m <sup>-3</sup> ) | Conc.<br>2014<br>(µg m <sup>-3</sup> ) | p-<br>value      | Trend<br>(µg m <sup>-3</sup> /yr) | TR<br>[%]   | RC [%]      |
| PM <sub>10</sub> (grav.)  | <b>41.1</b>                            | <b>19.2</b>                            | ***              | <b>-2.83</b>                      | <b>59.2</b> | <b>8.5</b>  |
|                           | 19.2                                   | 13.9                                   |                  | <b>-0.17</b>                      | 10.5        | 17.6        |
| PM <sub>2.5</sub> (grav.) | <b>31.6</b>                            | <b>13.2</b>                            | ***              | <b>-2.03</b>                      | <b>60.1</b> | <b>7.9</b>  |
|                           | 16.2                                   | 9.8                                    | +                | <b>-0.33</b>                      | 25.6        | 17.3        |
| PM <sub>10</sub> (OPC)    | <b>39.1</b>                            | <b>19.8</b>                            | ***              | <b>-2.20</b>                      | <b>50.4</b> | <b>10.0</b> |
|                           | 18.6                                   | 12.3                                   |                  | <b>-0.13</b>                      | 7.8         | 16.9        |
| PM <sub>2.5</sub> (OPC)   | <b>27.1</b>                            | <b>12.9</b>                            | **               | <b>-1.55</b>                      | <b>49.6</b> | <b>9.8</b>  |
|                           | 16.5                                   | 9.3                                    | +                | <b>-0.26</b>                      | 21.2        | 17.5        |

**Table 2:** Mann-Kendall and Multi-exponential trends of different chemical species in PM<sub>10</sub> at BCN (bold italic) and MSY. Type of trend: linear (L), single-exponential (SE), double exponential (DE); a (µgm<sup>-3</sup>) and τ (yr) are the constants and the characteristic times, respectively, of the exponential data fittings; NL (%) = Non-Linearity; TR (%) = Total Reduction; RC (%) = Residual Component; ns = not statistically significant; ni = not included. Significance of the trends: \*\*\* (p-value < 0.001), \*\* (p-value < 0.01), \* (p-value < 0.05), + (p-value < 0.1).

| Specie                         | PM <sub>10</sub><br>(BCN;MSY)              |                                            | Fit<br>type      | NL<br>(%)            | p-<br>value       | Mann-<br>Kendall fit             | Multi-exponential fit     |                     |                                  | TR<br>(%)        | RC<br>(%)        |
|--------------------------------|--------------------------------------------|--------------------------------------------|------------------|----------------------|-------------------|----------------------------------|---------------------------|---------------------|----------------------------------|------------------|------------------|
|                                | Concentration<br>2004 (µgm <sup>-3</sup> ) | Concentration<br>2014 (µgm <sup>-3</sup> ) |                  |                      |                   | Trend<br>(µgm <sup>-3</sup> /yr) | a<br>(µgm <sup>-3</sup> ) | τ<br>(yr)           | Trend<br>(µgm <sup>-3</sup> /yr) |                  |                  |
| Pb                             | <b><i>0.02685</i></b>                      | <b><i>0.00694</i></b>                      | <b><i>SE</i></b> | <b><i>27</i></b>     | <b><i>***</i></b> |                                  | <b><i>0.03246</i></b>     | <b><i>5.12</i></b>  | <b><i>-0.00222</i></b>           | <b><i>80</i></b> | <b><i>17</i></b> |
|                                | 0.00481                                    | 0.00190                                    | SE               | 11                   | **                |                                  | 0.00553                   | 10.22               | -0.00031                         | 62               | 13               |
| Cd                             | <b><i>0.00043</i></b>                      | <b><i>0.00015</i></b>                      | <b><i>SE</i></b> | <b><i>19</i></b>     | <b><i>***</i></b> |                                  | <b><i>0.00048</i></b>     | <b><i>7.59</i></b>  | <b><i>-3.10e-5</i></b>           | <b><i>73</i></b> | <b><i>17</i></b> |
|                                | 0.00017                                    | 0.00006                                    | SE               | 18                   | **                |                                  | 0.00018                   | 7.92                | -1.12E-5                         | 72               | 16               |
| As                             | <b><i>0.00094</i></b>                      | <b><i>0.00036</i></b>                      | <b><i>SE</i></b> | <b><i>14</i></b>     | <b><i>***</i></b> |                                  | <b><i>0.00118</i></b>     | <b><i>9.11</i></b>  | <b><i>-7.07E-5</i></b>           | <b><i>67</i></b> | <b><i>11</i></b> |
|                                | 0.00029                                    | 0.00017                                    | L                | <10                  | **                | 1.29E-5                          |                           |                     |                                  | 50               | 9                |
| V                              | <b><i>0.01116</i></b>                      | <b><i>0.00454</i></b>                      | <b><i>SE</i></b> | <b><i>12</i></b>     | <b><i>**</i></b>  |                                  | <b><i>0.01502</i></b>     | <b><i>10.04</i></b> | <b><i>-0.00086</i></b>           | <b><i>63</i></b> | <b><i>17</i></b> |
|                                | 0.00328                                    | 0.00175                                    | L                | <10                  | **                | -0.00022                         |                           |                     |                                  | 59               | 15               |
| Ni                             | <b><i>0.00531</i></b>                      | <b><i>0.00284</i></b>                      | <b><i>SE</i></b> | <b><i>11</i></b>     | <b><i>***</i></b> |                                  | <b><i>0.00678</i></b>     | <b><i>10.61</i></b> | <b><i>-0.00037</i></b>           | <b><i>61</i></b> | <b><i>16</i></b> |
|                                | 0.00155                                    | 0.00100                                    | L                | <10                  | **                | -7.10E-5                         |                           |                     |                                  | 43               | 20               |
| Sn                             | <i>ni</i>                                  | <i>ni</i>                                  |                  |                      |                   |                                  |                           |                     |                                  |                  |                  |
|                                | 0.00127                                    | 0.00057                                    | L                | <10                  | *                 | -3.65E-5                         |                           |                     |                                  | 39               | 16               |
| Cu                             | <i>ni</i>                                  | <i>ni</i>                                  |                  |                      |                   |                                  |                           |                     |                                  |                  |                  |
|                                | 0.00420                                    | 0.00216                                    | L                | <10                  | *                 | -0.00014                         |                           |                     |                                  | 36               | 20               |
| Sb                             | <i>ni</i>                                  | <i>ni</i>                                  |                  |                      |                   |                                  |                           |                     |                                  |                  |                  |
|                                | 0.00058                                    | 0.00025                                    | SE               | 11                   | **                |                                  | 0.00064                   | 10.46               | -3.57E-5                         | 62               | 13               |
| SO <sub>4</sub> <sup>2-</sup>  | <b><i>5.74436</i></b>                      | <b><i>2.28596</i></b>                      | <b><i>SE</i></b> | <b><i>12</i></b>     | <b><i>***</i></b> |                                  | <b><i>6.56033</i></b>     | <b><i>9.81</i></b>  | <b><i>-0.37868</i></b>           | <b><i>64</i></b> | <b><i>12</i></b> |
|                                | 2.84849                                    | 1.67712                                    | L                | <10                  | **                | -0.11836                         |                           |                     |                                  | 42               | 18               |
| NO <sub>3</sub> <sup>-</sup>   | <b><i>5.07816</i></b>                      | <b><i>1.72401</i></b>                      | <b><i>SE</i></b> | <b><i>12</i></b>     | <b><i>**</i></b>  |                                  | <b><i>6.49890</i></b>     | <b><i>9.83</i></b>  | <b><i>-0.37484</i></b>           | <b><i>64</i></b> | <b><i>15</i></b> |
|                                | 1.80724                                    | 0.67419                                    | L                | <10                  | **                | -0.10593                         |                           |                     |                                  | 44               | 13               |
| NH <sub>4</sub> <sup>+</sup>   | <b><i>1.92062</i></b>                      | <b><i>0.57008</i></b>                      | <b><i>SE</i></b> | <b><i>12</i></b>     | <b><i>***</i></b> |                                  | <b><i>1.90645</i></b>     | <b><i>9.64</i></b>  | <b><i>-0.11095</i></b>           | <b><i>65</i></b> | <b><i>14</i></b> |
|                                | 1.14268                                    | 0.40135                                    | SE               | 13                   | †                 |                                  | 1.28868                   | 9.26                | -0.07640                         | 66               | 22               |
| Al <sub>2</sub> O <sub>3</sub> | <i>ni</i>                                  | <i>ni</i>                                  |                  |                      |                   |                                  |                           |                     |                                  |                  |                  |
|                                | 0.72357                                    | 0.46382                                    | L                | <10                  | *                 | -0.02383                         |                           |                     |                                  | 34               | 18               |
| Ca                             | <i>ni</i>                                  | <i>ni</i>                                  |                  |                      |                   |                                  |                           |                     |                                  |                  |                  |
|                                | 0.42703                                    | 0.28279                                    | L                | <10                  | *                 | 0.01638                          |                           |                     |                                  | 38               | 17               |
| Fe                             | <i>ni</i>                                  | <i>ni</i>                                  |                  |                      |                   |                                  |                           |                     |                                  |                  |                  |
|                                | 0.22371                                    | 0.14895                                    | L                | <10                  | +                 | 0.00593                          |                           |                     |                                  | 6                | 44               |
| Na                             | <b><i>1.02188</i></b>                      | <b><i>0.77408</i></b>                      | <b><i>L</i></b>  | <b><i>&lt;10</i></b> | <b><i>*</i></b>   | <b><i>-0.03943</i></b>           |                           |                     |                                  | <b><i>34</i></b> | <b><i>12</i></b> |
|                                |                                            |                                            |                  |                      | ns                |                                  |                           |                     |                                  |                  |                  |

**Table 3:** Mann-Kendall and Multi-exponential trends of different chemical species in PM<sub>2.5</sub> at BCN (bold italic) and MSY. Type of trend: linear (L), single-exponential (SE), double exponential (DE); a (µgm<sup>-3</sup>) and τ (yr) are the constants and the characteristic times, respectively, of the exponential data fittings; NL (%) = Non-Linearity; TR (%) = Total Reduction; RC (%) = Residual Component; ns = not statistically significant; ni = not included. Significance of the trends: \*\*\* (p-value < 0.001), \*\* (p-value < 0.01), \* (p-value < 0.05), + (p-value < 0.1).

| Specie                         | PM <sub>2.5</sub><br>(BCN;MSY)             |                                            | Fit<br>type | NL<br>(%) | p-value | Mann-Kendall fit               | Multi-exponential fit     |                     |                                | TR<br>(%)        | RC<br>(%)        |
|--------------------------------|--------------------------------------------|--------------------------------------------|-------------|-----------|---------|--------------------------------|---------------------------|---------------------|--------------------------------|------------------|------------------|
|                                | Concentration<br>2004 (µgm <sup>-3</sup> ) | Concentration<br>2014 (µgm <sup>-3</sup> ) |             |           |         | Trend<br>µgm <sup>-3</sup> /yr | a<br>(µgm <sup>-3</sup> ) | τ<br>(yr)           | Trend<br>µgm <sup>-3</sup> /yr |                  |                  |
| Pb                             | <b><i>0.02117</i></b>                      | <b><i>0.00500</i></b>                      | SE          | 27        | ***     |                                | <b><i>0.02390</i></b>     | <b><i>6.24</i></b>  | <b><i>-0.00163</i></b>         | <b><i>80</i></b> | <b><i>13</i></b> |
|                                | 0.00642                                    | 0.00149                                    | SE          | 28        | ***     |                                | 0.00716                   | 6.08                | <b><i>-0.00049</i></b>         | 81               | 18               |
| Cd                             | <b><i>0.00041</i></b>                      | <b><i>0.00011</i></b>                      | SE          | 23        | ***     |                                | <b><i>0.00047</i></b>     | <b><i>6.81</i></b>  | <b><i>-3.11E-5</i></b>         | <b><i>77</i></b> | <b><i>13</i></b> |
|                                | 0.00020                                    | 0.00005                                    | SE          | 23        | ***     |                                | 0.00020                   | 6.77                | <b><i>-1.35E-5</i></b>         | 77               | 18               |
| As                             | <b><i>0.00069</i></b>                      | <b><i>0.00027</i></b>                      | SE          | 14        | ***     |                                | <b><i>0.00091</i></b>     | <b><i>9.00</i></b>  | <b><i>-5.43E-5</i></b>         | <b><i>67</i></b> | <b><i>11</i></b> |
|                                | 0.00029                                    | 0.00013                                    | SE          | 15        | **      |                                | 0.00033                   | 8.56                | <b><i>-2.04E-5</i></b>         | 69               | 19               |
| V                              | <b><i>0.00823</i></b>                      | <b><i>0.00368</i></b>                      | SE          | 11        | **      |                                | <b><i>0.01121</i></b>     | <b><i>11.13</i></b> | <b><i>-0.00061</i></b>         | <b><i>59</i></b> | <b><i>16</i></b> |
|                                | 0.00271                                    | 0.00130                                    | L           | <10       | **      | <b><i>-0.00017</i></b>         |                           |                     |                                | <b><i>64</i></b> | <b><i>24</i></b> |
| Ni                             | <b><i>0.00402</i></b>                      | <b><i>0.00185</i></b>                      | SE          | 10        | **      |                                | <b><i>0.00498</i></b>     | <b><i>11.23</i></b> | <b><i>-0.00027</i></b>         | <b><i>59</i></b> | <b><i>15</i></b> |
|                                | 0.00189                                    | 0.00080                                    | SE          | 13        | **      |                                | 0.00205                   | 9.36                | <b><i>-0.00012</i></b>         | 42               | 21               |
| Sn                             | <i>ni</i>                                  | <i>ni</i>                                  |             |           |         |                                |                           |                     |                                |                  |                  |
|                                | 0.00157                                    | 0.00043                                    | L           | <10       | ***     | <b><i>-0.00084</i></b>         |                           |                     |                                | <b><i>61</i></b> | <b><i>12</i></b> |
| Cu                             | <i>ni</i>                                  | <i>ni</i>                                  |             |           |         |                                |                           |                     |                                |                  |                  |
|                                | 0.00394                                    | 0.00113                                    | SE          | 14        | **      |                                | 0.00426                   | 8.99                | <b><i>-0.00026</i></b>         | 67               | 13               |
| Sb                             | <i>ni</i>                                  | <i>ni</i>                                  |             |           |         |                                |                           |                     |                                |                  |                  |
|                                | 0.00053                                    | 0.00015                                    | DE          | 48        | **      |                                | 0.00069<br>1.3E-6         | 4.52<br>-2.50       | <b><i>-3.86E-5</i></b>         | 70               | 16               |
| SO <sub>4</sub> <sup>2-</sup>  | <b><i>4.86564</i></b>                      | <b><i>1.92388</i></b>                      | SE          | 12        | ***     |                                | <b><i>5.64582</i></b>     | <b><i>9.69</i></b>  | <b><i>-0.32778</i></b>         | <b><i>64</i></b> | <b><i>9</i></b>  |
|                                | 2.98922                                    | 1.43381                                    | L           | <10       | **      | <b><i>-0.16222</i></b>         |                           |                     |                                | <b><i>54</i></b> | <b><i>15</i></b> |
| NO <sub>3</sub> <sup>-</sup>   | <b><i>3.45513</i></b>                      | <b><i>0.86002</i></b>                      | SE          | 19        | ***     |                                | <b><i>4.14459</i></b>     | <b><i>7.61</i></b>  | <b><i>-0.26753</i></b>         | <b><i>73</i></b> | <b><i>16</i></b> |
|                                | 1.66095                                    | 0.29452                                    | SE          | 30        | ***     |                                | 1.96014                   | 5.81                | <b><i>-0.13550</i></b>         | 82               | 21               |
| NH <sub>4</sub> <sup>+</sup>   | <b><i>2.19735</i></b>                      | <b><i>0.68393</i></b>                      | SE          | 11        | ***     |                                | <b><i>2.27813</i></b>     | <b><i>10.53</i></b> | <b><i>-0.12701</i></b>         | <b><i>61</i></b> | <b><i>15</i></b> |
|                                | 1.39366                                    | 0.48049                                    | SE          | 18        | **      |                                | 1.62588                   | 7.94                | <b><i>-0.10266</i></b>         | 72               | 14               |
| Al <sub>2</sub> O <sub>3</sub> | <i>ni</i>                                  | <i>ni</i>                                  |             |           |         |                                |                           |                     |                                |                  |                  |
|                                | 0.30245                                    | 0.10153                                    | SE          | 13        | *       |                                | 0.26678                   | 9.36                | <b><i>-0.01574</i></b>         | 66               | 35               |
| Ca                             | <i>ni</i>                                  | <i>ni</i>                                  |             |           |         |                                |                           |                     |                                |                  |                  |
|                                | 0.11478                                    | 0.06540                                    | L           | <10       | +       | <b><i>-0.00494</i></b>         |                           |                     |                                | <b><i>50</i></b> | <b><i>33</i></b> |
| Fe                             | <i>ni</i>                                  | <i>ni</i>                                  |             |           |         |                                |                           |                     |                                |                  |                  |
|                                | 0.09679                                    | 0.03716                                    | L           | <10       | *       | <b><i>-0.00504</i></b>         |                           |                     |                                | <b><i>61</i></b> | <b><i>31</i></b> |
| Na                             | <b><i>0.27476</i></b>                      | <b><i>0.17863</i></b>                      | L           | <10       | +       | <b><i>-0.01247</i></b>         |                           |                     |                                | <b><i>41</i></b> | <b><i>15</i></b> |
|                                | 0.13091                                    | 0.07252                                    | L           | <10       | *       | <b><i>-0.00584</i></b>         |                           |                     |                                | <b><i>45</i></b> | <b><i>18</i></b> |

**Table 4:** Mann-Kendall and Multi-exponential trends of source contributions in PM<sub>10</sub> from PMF at BCN (bold italic) and MSY. Type: linear (L), single-exponential (SE), double exponential (DE); **a** ( $\mu\text{gm}^{-3}$ ) and  $\tau$  (yr) are the constants and the characteristic times, respectively, of the exponential data fittings; NL (%) = Non-Linearity; TR (%) = Total Reduction; RC (%) = Residual Component; **ni = not included**. Significance of the trends following the Mann-Kendall test: \*\*\* (p-value < 0.001), \*\* (p-value < 0.01), \* (p-value < 0.05), + (p-value < 0.1).

| Source                      | PM <sub>10</sub><br>(BCN;MSY)                |                                              | Fit<br>type | NL<br>(%) | p-value    | Mann-<br>Kendall fit                       | Multi-exponential fit        |                              |                                            | TR<br>(%) | RC<br>(%) |
|-----------------------------|----------------------------------------------|----------------------------------------------|-------------|-----------|------------|--------------------------------------------|------------------------------|------------------------------|--------------------------------------------|-----------|-----------|
|                             | Contribution<br>2004 ( $\mu\text{gm}^{-3}$ ) | Contribution<br>2014 ( $\mu\text{gm}^{-3}$ ) |             |           |            | Trend<br>( $\mu\text{gm}^{-3}/\text{yr}$ ) | a<br>( $\mu\text{gm}^{-3}$ ) | $\tau$<br>(yr)               | Trend<br>( $\mu\text{gm}^{-3}/\text{yr}$ ) |           |           |
| <b>Secondary</b><br>sulfate | <b>10.27</b>                                 | <b>3.38</b>                                  | <b>DE</b>   | <b>45</b> | <b>**</b>  |                                            | <b>12.33</b><br><b>3.82</b>  | <b>1.65</b><br><b>105.80</b> | <b>-0.21</b>                               | <b>67</b> | <b>16</b> |
|                             | 6.57                                         | 3.07                                         | <b>SE</b>   | <b>12</b> | <b>**</b>  |                                            | <b>5.99</b>                  | <b>13.22</b>                 | <b>-0.32</b>                               | 53        | <b>21</b> |
| <b>Secondary</b><br>nitrate | <b>6.99</b>                                  | <b>1.96</b>                                  | <b>SE</b>   | <b>14</b> | <b>***</b> |                                            | <b>8.54</b>                  | <b>8.96</b>                  | <b>-0.52</b>                               | <b>67</b> | <b>13</b> |
|                             | 2.03                                         | 0.47                                         | SE          | 15        | **         |                                            | 2.44                         | 8.59                         | <b>-0.15</b>                               | 69        | 17        |
| V-Ni bearing                | <b>4.23</b>                                  | <b>1.84</b>                                  | <b>SE</b>   | <b>11</b> | <b>**</b>  |                                            | <b>5.66</b>                  | <b>10.59</b>                 | <b>-0.32</b>                               | <b>61</b> | <b>19</b> |
|                             | 0.79                                         | 0.44                                         | L           | 8         | **         | <b>-0.07</b>                               |                              |                              |                                            | <b>64</b> | <b>25</b> |
| Industrial/Metallurgy (BCN) | <b>1.64</b>                                  | <b>0.71</b>                                  | <b>SE</b>   | <b>21</b> | <b>***</b> |                                            | <b>1.76</b>                  | <b>9.56</b>                  | <b>-0.10</b>                               | <b>65</b> | <b>16</b> |
| Mineral                     | <b>ni</b>                                    | <b>ni</b>                                    |             |           |            |                                            |                              |                              |                                            |           |           |
|                             | 3.46                                         | 2.32                                         | L           | 5         | +          | <b>-0.10</b>                               |                              |                              |                                            | <b>30</b> | <b>21</b> |
| Industrial/Traffic (MSY)    | 2.08                                         | 1.01                                         | L           | 7         | **         | <b>-0.11</b>                               |                              |                              |                                            | 56        | 13        |

## Figure Captions:

**Figure 1:** Location of the Barcelona (BCN) and Montseny (MSY) measuring stations. Red full circle highlights the location of the BCN measuring station before 2009. Green full circle highlights the new location of the BCN (from 2009) and MSY measuring stations.

**Figure 2:** Mann-Kendall fit of PM<sub>2.5</sub> trends at MSY station for the periods 2002-2010 (as in Cusack et al., 2012), 2004 – 2014 (this work), and 2002 – 2014 (largest period available in the time of writing). Reported are: magnitude of the trends [ $\mu\text{g m}^{-3}/\text{yr}$ ]; p-value; Total Reduction (TR) and Residual Component (RC). Significance of the trends following the Mann-Kendall test: \*\*\* (p-value < 0.001), \*\* (p-value < 0.01), \* (p-value < 0.05), + (p-value < 0.1).

**Figure 3:** Mann-Kendall (MK) and Multi-exponential (ME) trends for chemical species at BCN in PM<sub>10</sub>. Measured concentration (green line); Multi-exponential trend (red line); Multi-exponential residuals (blue line); Mann-Kendall trend (black line); Mann-Kendall residuals (grey line). Trend type: linear (L), single-exponential (SE), double exponential (DE).

**Figure 4:** Mann-Kendall (MK) and Multi-exponential (ME) trends for chemical species at MSY in PM<sub>10</sub>. Measured concentration (green line); Multi-exponential trend (red line); Multi-exponential residuals (blue line); Mann-Kendall trend (black line); Mann-Kendall residuals (grey line). Trend type: linear (L), single-exponential (SE), double exponential (DE).

**Figure 5:** Source contributions from PMF model in PM<sub>10</sub> at Montseny (MSY) and Barcelona (BCN). Mean values during 2004-2014. Values reported are: **Source;  $\mu\text{g}/\text{m}^3$ ; %**.

**Figure 6:** Mann-Kendall and Multi-exponential trends for source contributions in PM<sub>10</sub> at BCN. Measured concentration (green line); Multi-exponential trend (red line); Multi-exponential residuals (blue line); Mann-Kendall trend (black line); Mann-Kendall residuals (grey line). Trend type: linear (L), single-exponential (SE), double exponential (DE). Highlighted with yellow colour the source contributions at BCN from *Mineral, Traffic and Road/work resuspension* were excluded from the trend discussion.

**Figure 7:** Mann-Kendall and Multi-exponential trends for source contributions in PM<sub>10</sub> at MSY. Measured concentration (green line); Multi-exponential trend (red line); Multi-exponential residuals (blue line); Mann-Kendall trend (black line); Mann-Kendall residuals (grey line). Trend type: linear (L), single-exponential (SE), double exponential (DE).

**Figure 8:** Spanish national emission of SO<sub>2</sub> and NO<sub>x</sub> (normalized to year 2004).

**Figure 9:** NASA OMI level 3 tropospheric NO<sub>2</sub> column plotted using the Giovanni online data system, developed and maintained by the NASA GES DISC.

**Figure 10:** Annual (2004–2014) energy consumption for Spain (normalized to year 2004). Data from the Spanish Ministry of Industry (MINETUR, 2013).

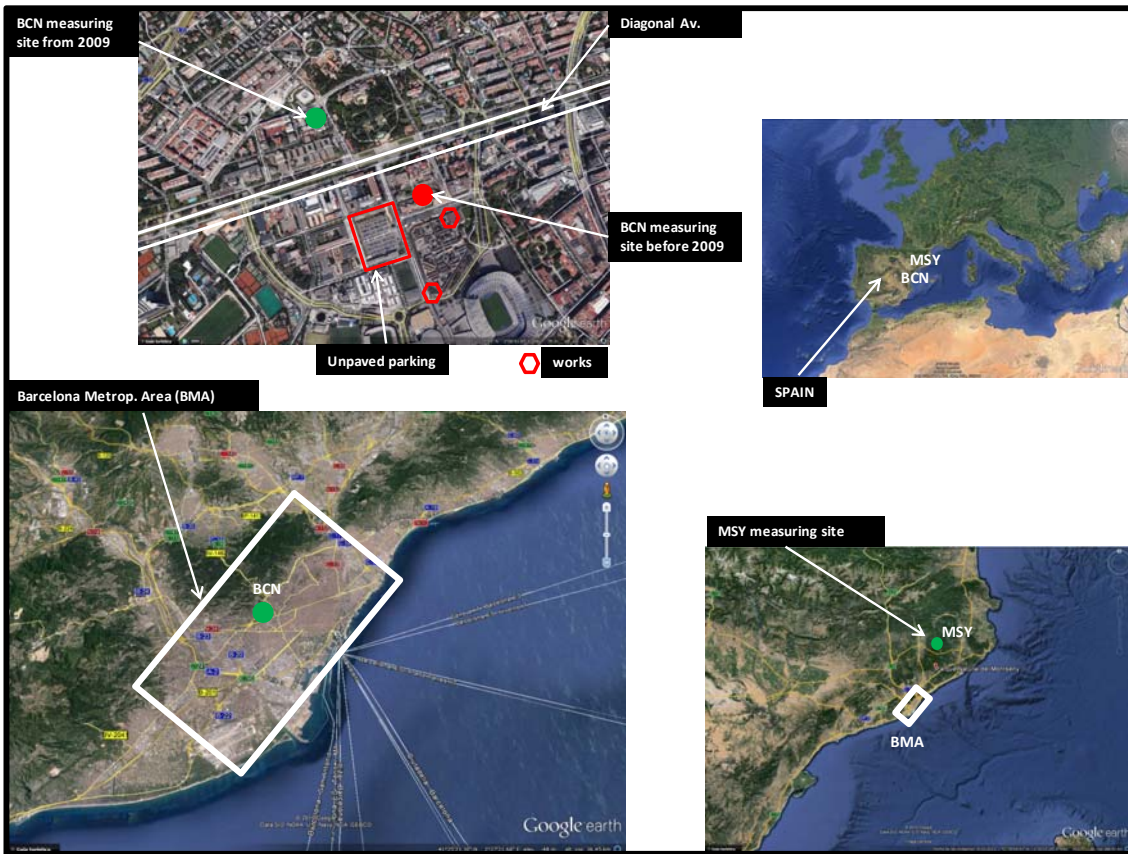

Figure 1

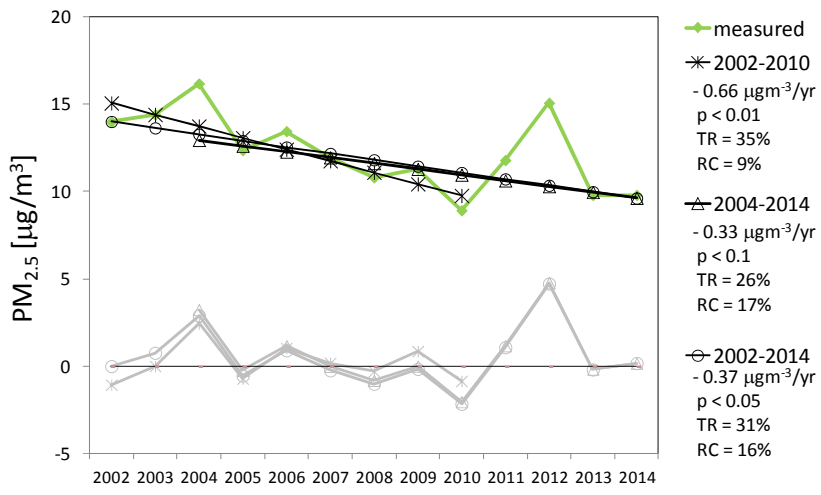

Figure 2

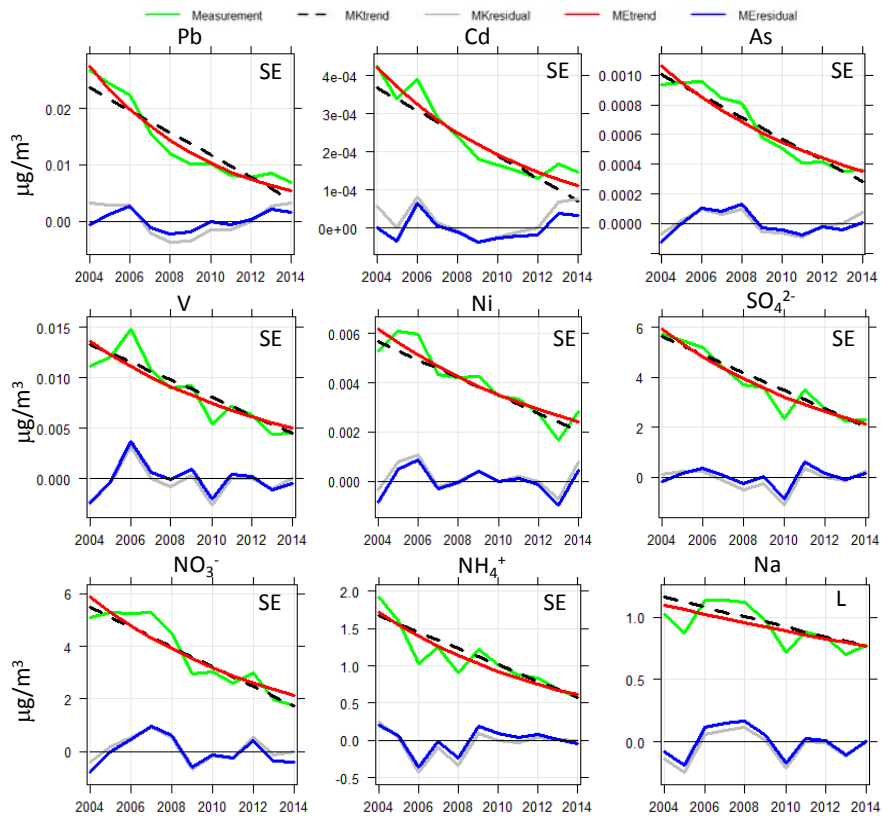

Figure 3



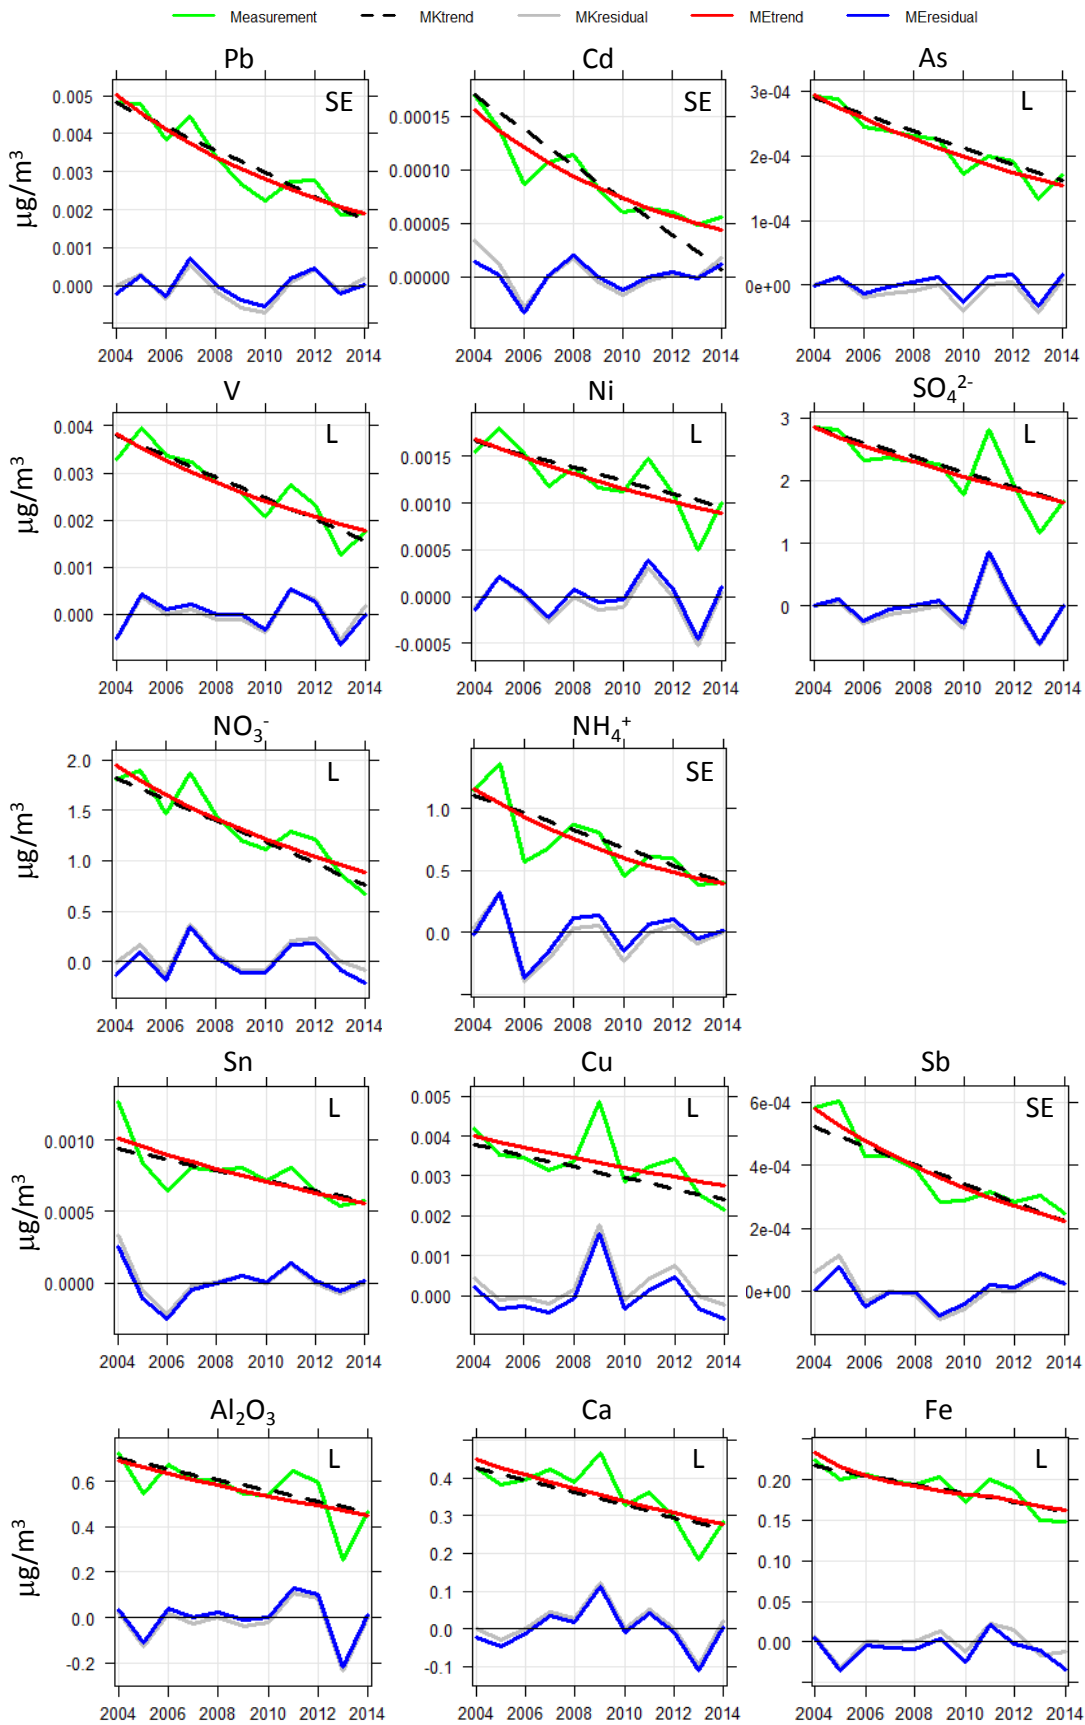

Figure 4

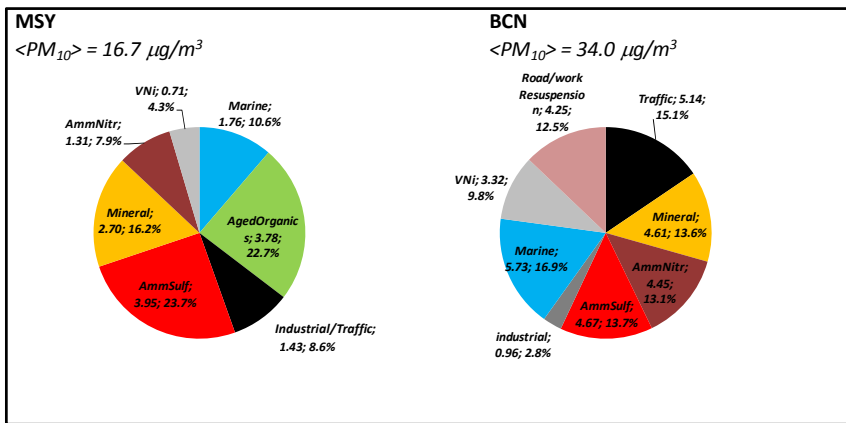

Figure 5

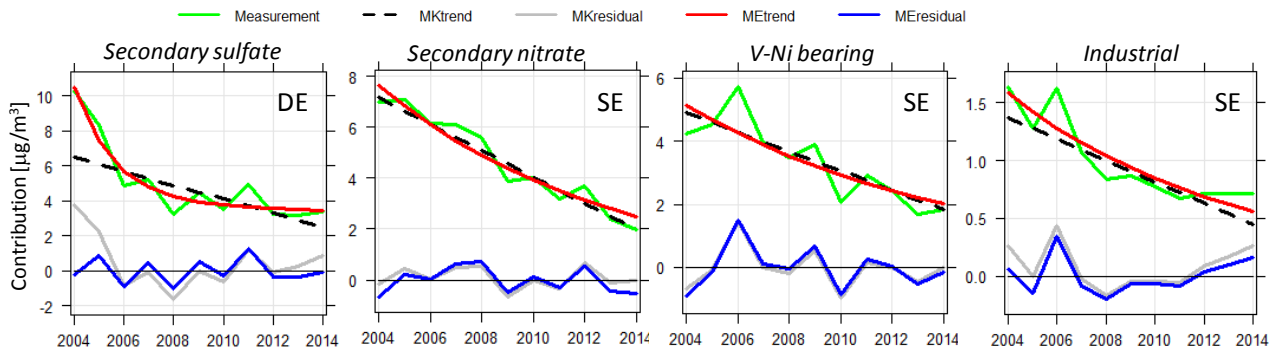

Figure 6

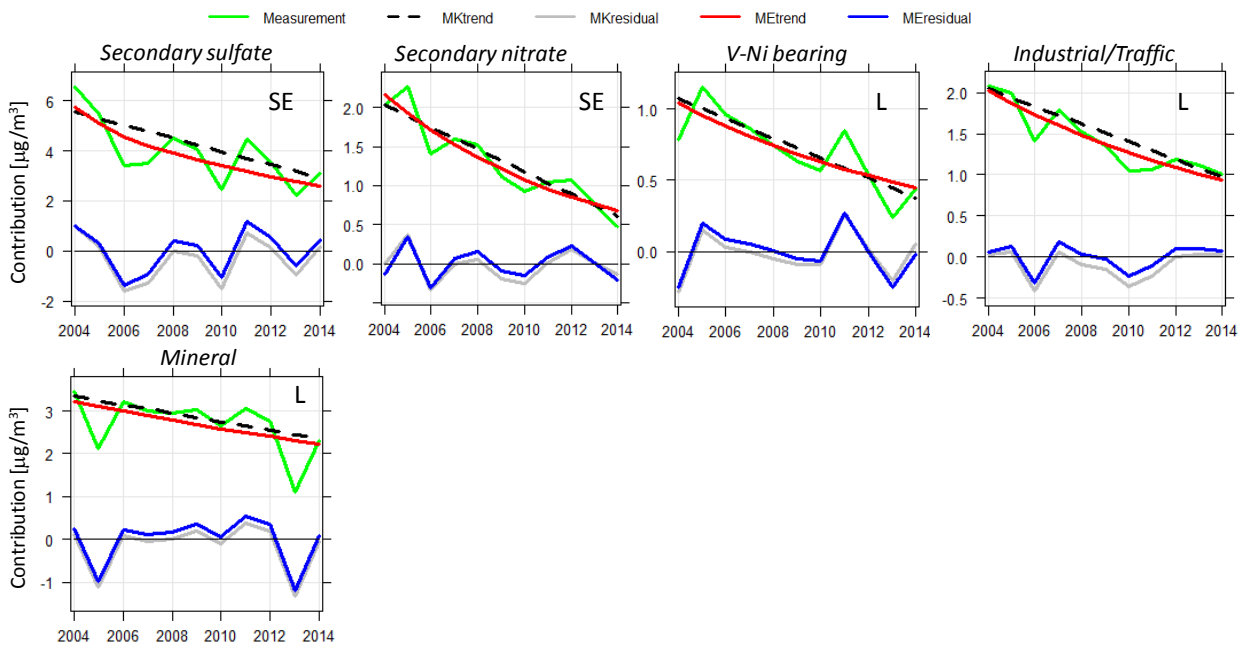

Figure 7

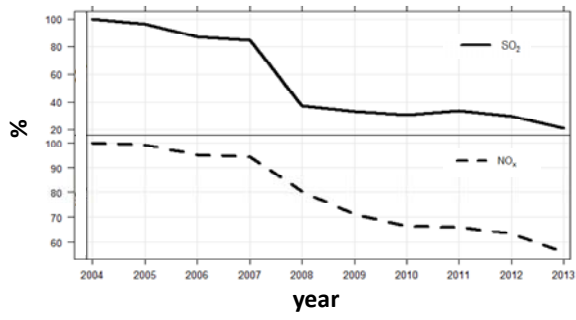

Figure 8

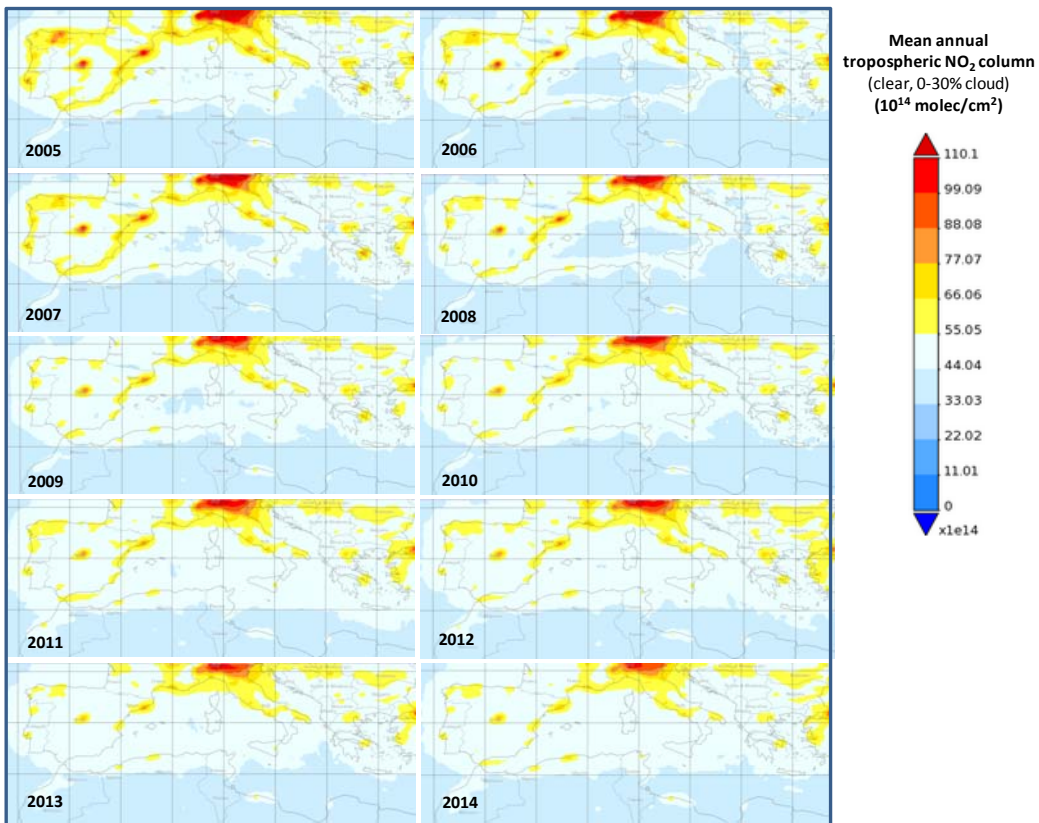

Figure 9

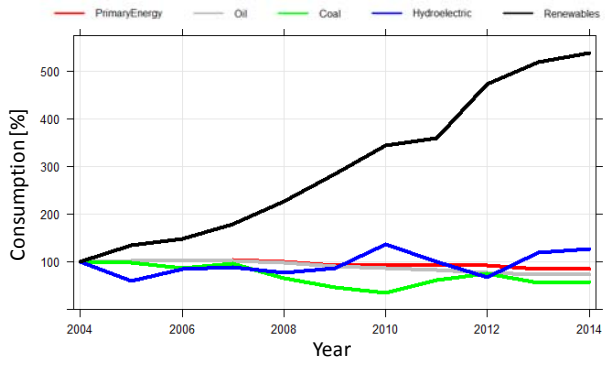

Figure 10

## Supporting Information

### 1) Effect of the change of the location of the measuring station in BCN in 2009

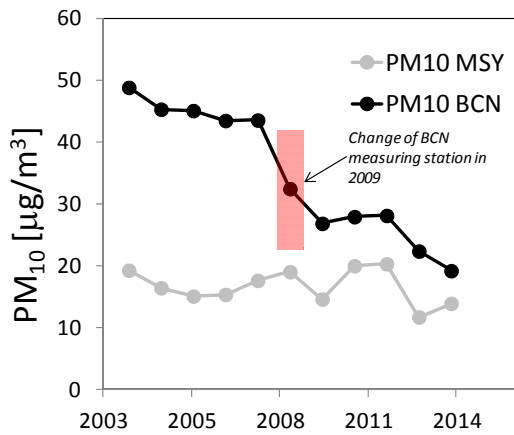

**Figure SI-1:** Trends of  $\text{PM}_{10}$  concentrations from gravimetric measurements at BCN and MSY. Red rectangle highlights the decrease of  $\text{PM}_{10}$  concentration at BCN due to the change of the location of the BCN measuring station in 2009.

### 2) PMF source profiles at BCN and MSY

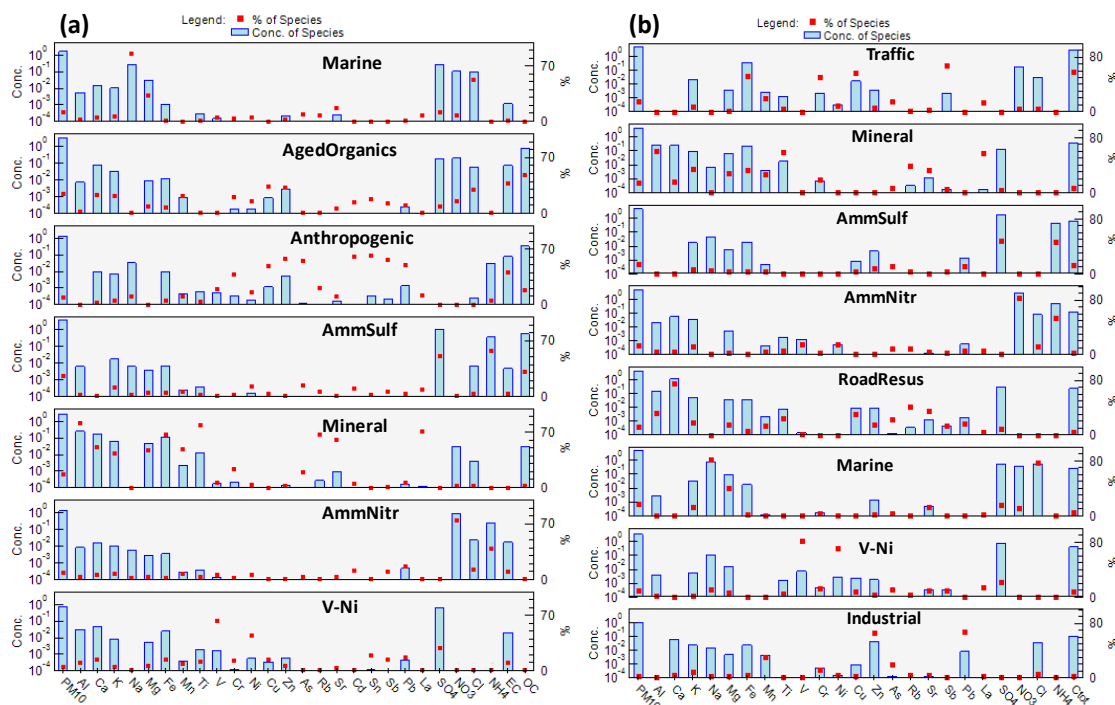

**Figure SI-2:** Chemical profiles of the PMF sources at MSY (a) and BCN (b)

Source profiles from PMF analysis at BCN and MSY. Common sources at both BCN and MSY were: *Secondary Sulfate* (secondary inorganic source traced by  $\text{SO}_4^{2-}$ ,  $\text{NH}_4^+$  with contribution from OC), *Secondary nitrate* (secondary inorganic source traced by  $\text{NO}_3^-$  and  $\text{NH}_4^+$ ), *V-Ni bearing* (traced mainly by V, Ni and  $\text{SO}_4^{2-}$  it represents the direct emissions from heavy oil combustion), *mineral* (traced by typical crustal elements such as Al, Ca, Ti, Rb, Sr), *aged marine* (traced by Na and Cl mainly with contributions from  $\text{SO}_4^{2-}$  and  $\text{NO}_3^-$ ). Non common sources at MSY were: *Industrial/Traffic source* (Anthropogenic source traced by EC, OC, Cr, Cu, Zn, As, Cd, Sn, Sb and Pb includes contributions from anthropogenic sources such as traffic and metallurgic) and *Aged organics* (traced by OC and EC mainly with maxima in summer indicating a biogenic origin). Non common sources at BCN were: *Traffic* (traced by Cnm, Cr, Cu, Sb and Fe mainly and contributing  $5.14 \mu\text{g}/\text{m}^3$  (15.1%)), *Road resuspension* (traced by both crustal elements, mainly Ca, and traffic tracers such as Sb, Cu and Sn and contributing  $4.25 \mu\text{g}/\text{m}^3$  (12.5%)) and *Industrial* (traced by Pb, Cd, As and Zn and contributing  $0.96 \mu\text{g}/\text{m}^3$  (2.8%)).

### 3) OC:EC ratio statistic at Montseny (MSY)

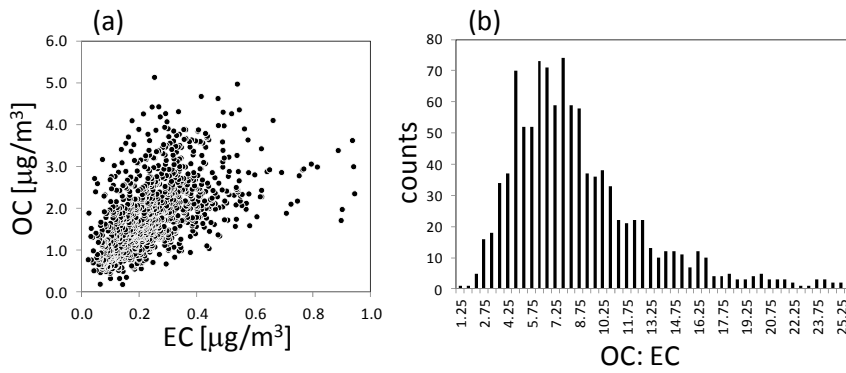

**Figure SI-3:** OC and EC scatterplot (a) and frequency distribution of the OC:EC ratio (b) at Montseny (MSY) station.

Mean and median values of the OC:EC ratio at MSY were 9.1 and 7.8, respectively.

**4) PMF Barcelona: 2007-2014 (with OC and EC) vs. 2004 – 2014 (with Cnm)**

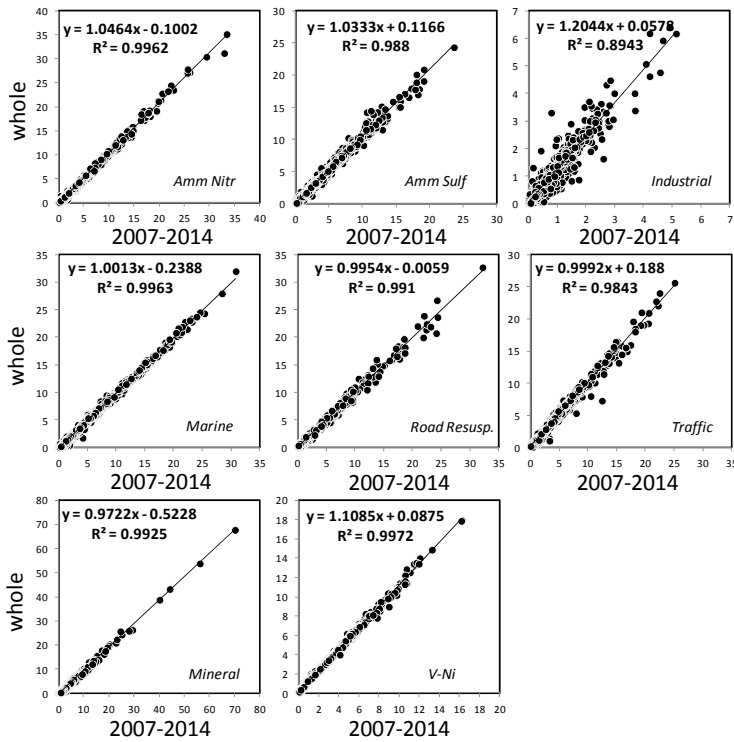

**Figure SI-4:** Comparison between PMF results at BCN obtained using the period 2007-2014 (separate OC and EC measurements available) and using the whole period 2004-2014 (Cnm was used in PMF).

**5) OC:EC ratio statistic at Barcelona (BCN)**



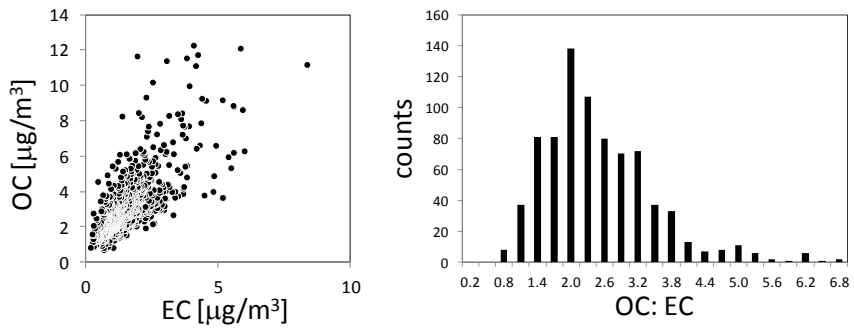

**Figure SI-5:** OC and EC scatterplot (a) and frequency distribution of the OC:EC ratio (b) at Barcelona (BCN) station.
